# Supplementary material for: Pragmatic estimates of the proportion of pediatric inpatients exposed to specific medications in the USA
Source: PubMed Central journal article supplement (PMC3810715; doi:10.1002/pds.3456), 2013-05-23
Supplement: pds0022-0890-sd1.pdf [file pds0022-0890-sd1.pdf]

## **Pragmatic Estimates of the Proportion of Pediatric Inpatients Exposed to Specific Medication in the United States**

Feudtner, Dai, Faerber, Metjian, and Luan

### Supplemental Figures:

Figure A: Conceptual Model of Extrapolation Estimate Approach

Figure B: Stratified Resampling Procedure

Figure C: Log Counts of All Generic Drugs and the 19 Selected Generic Drugs

Figure D: Sensitivity Analyses of the Impact of Varying the Percentage of Patients in the Sample Treated at Children's Hospitals

Figure E: Sensitivity Analyses of the Impact of Specific Hospitals within the Sample

### Supplemental Tables:

Table A: Estimated Percentage of Patients Exposed to the 700 Most Commonly Used Medications, Sorted by Percentage

Table B: Estimated Percentage of Patients Exposed to the 700 Most Commonly Used Medications, Sorted Alphabetically

**Figure A - Conceptual Model of Extrapolation Estimate Approach**

|                 | Patient Demographic & Clinical Data |     |         | Sample Frame        |                  | Sampling Method   | Drug Information  |                   |                   |
|-----------------|-------------------------------------|-----|---------|---------------------|------------------|-------------------|-------------------|-------------------|-------------------|
| <b>Database</b> | Age                                 | LOS | APR-DRG | Children's Hospital | General Hospital | Structure         | Acetaminophen     | Ampicillin        | Lev-albuterol     |
| PHIS            | ✓                                   | ✓   | ✓       | Partial             | Missing          | Complete          | ✓                 | ✓                 | ✓                 |
| Premier         | ✓                                   | ✓   | ✓       | Minimal             | Partial          | Complete          | ✓                 | ✓                 | ✓                 |
| KID             | ✓                                   | ✓   | ✓       | NIS                 | NIS              | Weight PSU Strata | <i>Estimate 1</i> | <i>Estimate 2</i> | <i>Estimate 3</i> |

Legend: PHIS, Pediatric Health Information System; Premier, Perspective Data Warehouse; KID, Agency for Healthcare Research and Quality's Healthcare Cost and Utilization Project's Kid's Inpatient Database; NIS, National Inpatient Sample; PSU, probability sampling unit.

**Figure B – Stratified Resampling Procedure**

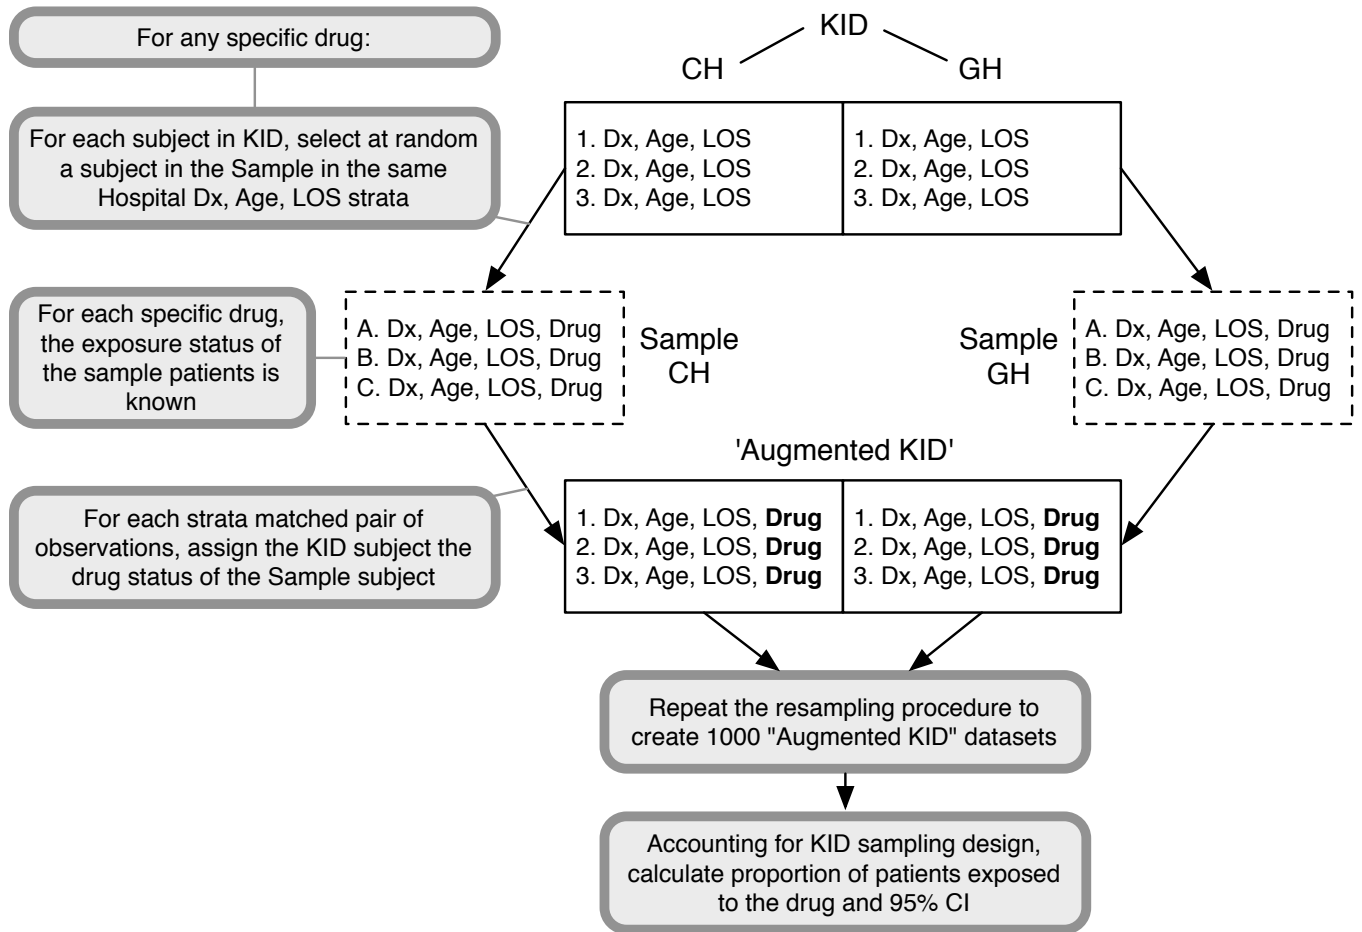

Legend: KID, Kids Inpatient Database; CH, children's hospitals; GH, general hospitals; DX, diagnosis as per the All Patient Refined Diagnostic Related Group; LOS, length of stay.

**Figure C – Log Counts of All Generic Drugs and the 19 Selected Generic Drugs**

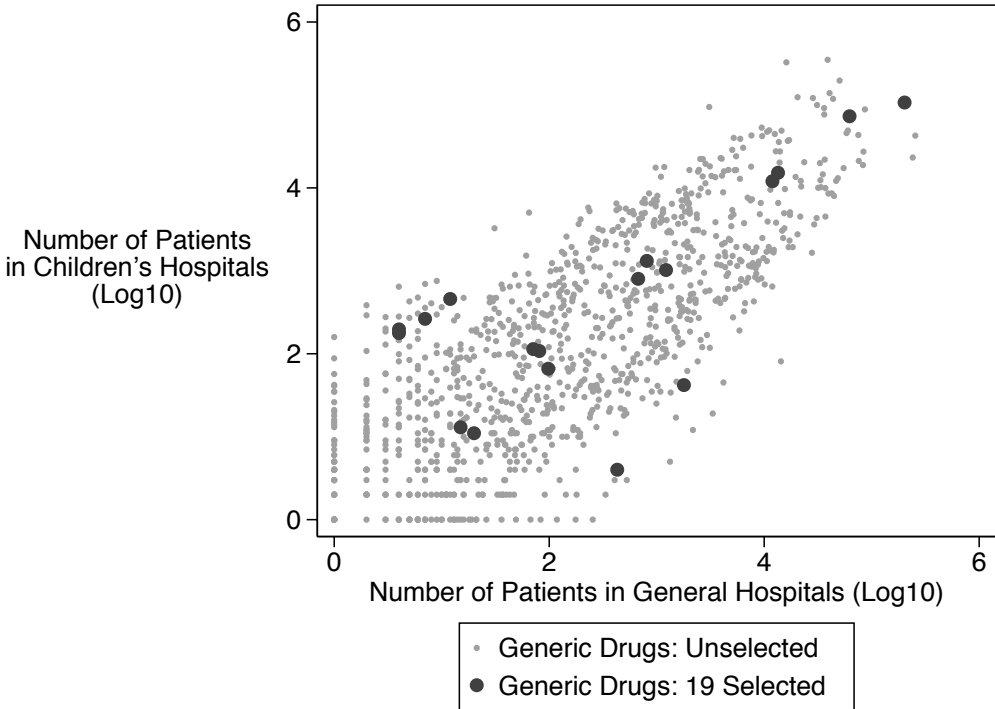

**Figure D – Sensitivity Analyses of the Impact of Varying the Percentage of Patients in the Sample Treated at Children’s Hospitals**

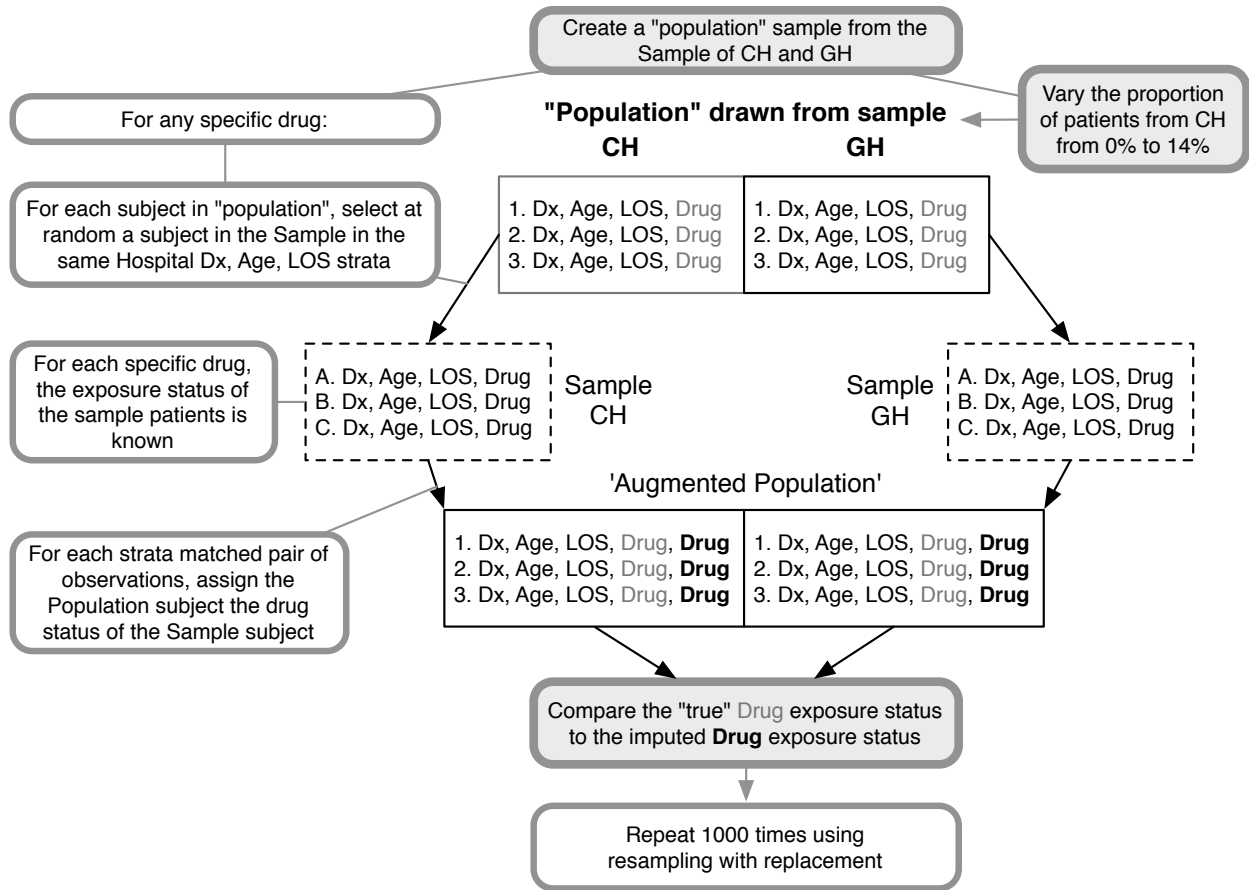

Legend: KID, Kids Inpatient Database; CH, children’s hospitals; GH, general hospitals; DX, diagnosis as per the All Patient Refined Diagnostic Related Group; LOS, length of stay.

**Figure E – Sensitivity Analyses of the Impact of Specific Hospitals within the Sample**

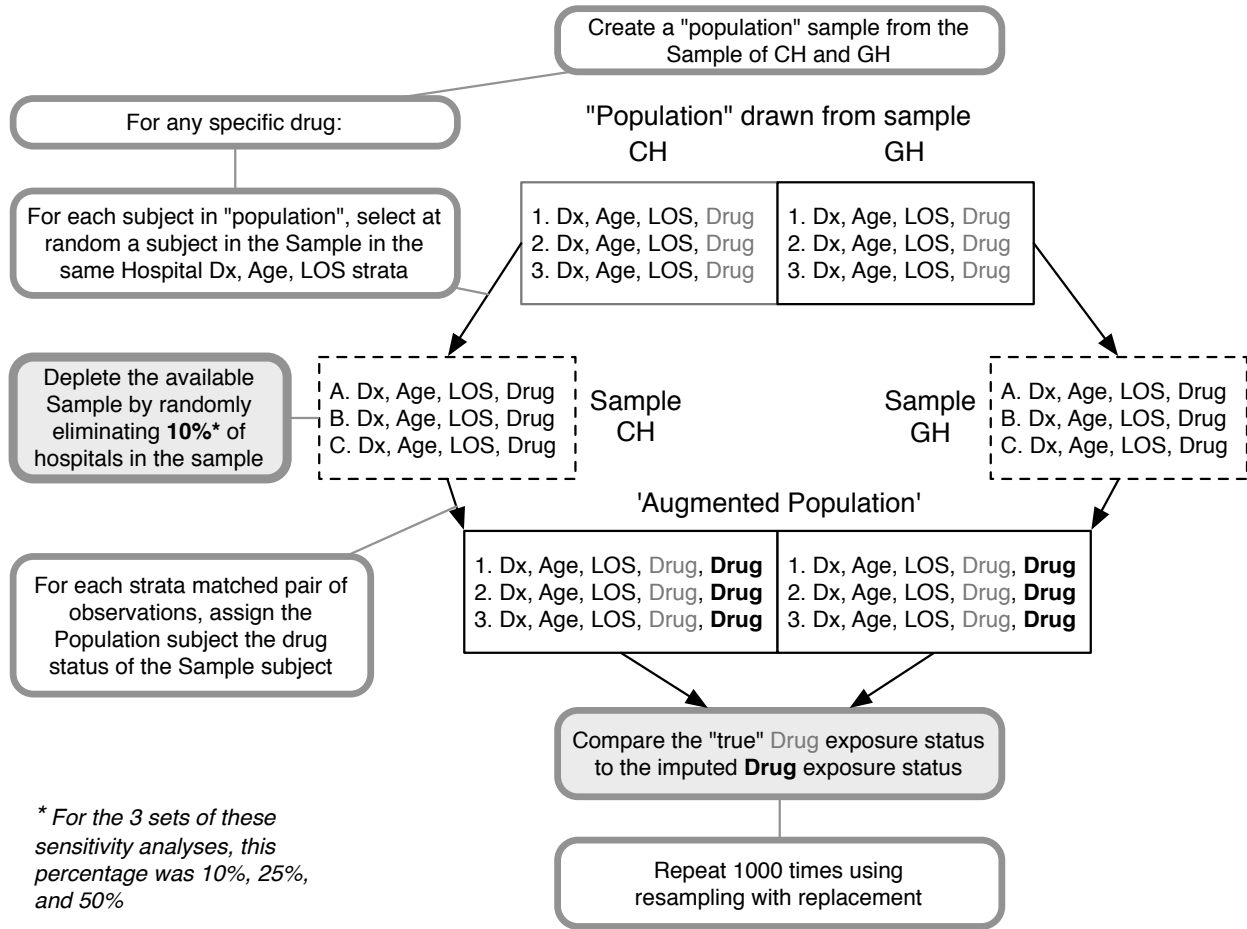

Legend: KID, Kids Inpatient Database; CH, children's hospitals; GH, general hospitals; DX, diagnosis as per the All Patient Refined Diagnostic Related Group; LOS, length of stay.

Table A: Estimated Percentage of Patients Exposed to the 700 Most Commonly Used Medications, Sorted by Percentage

| Drug                      | Estimate | 95% CI LL | 95% CI UL |
|---------------------------|----------|-----------|-----------|
| Acetaminophen             | 17.3647  | 17.3165   | 17.4138   |
| Lidocaine                 | 10.9071  | 10.8456   | 10.9614   |
| Ampicillin                | 8.9962   | 8.9632    | 9.0285    |
| Morphine                  | 7.8720   | 7.8523    | 7.8894    |
| Fentanyl                  | 7.8643   | 7.8463    | 7.8825    |
| Ceftriaxone               | 7.2806   | 7.2601    | 7.3014    |
| Ibuprofen                 | 7.0231   | 7.0014    | 7.0477    |
| Gentamicin                | 6.6243   | 6.5943    | 6.6544    |
| Albuterol                 | 6.4663   | 6.4473    | 6.4833    |
| Potassium chloride        | 6.0098   | 5.9871    | 6.0320    |
| Midazolam                 | 5.9647   | 5.9450    | 5.9831    |
| Ondansetron               | 5.9153   | 5.8978    | 5.9336    |
| Propofol                  | 5.2665   | 5.2502    | 5.2826    |
| Heparin                   | 4.9935   | 4.9736    | 5.0118    |
| Cefazolin                 | 4.2439   | 4.2298    | 4.2581    |
| Methylprednisolone        | 3.8684   | 3.8541    | 3.8824    |
| Ranitidine                | 3.8649   | 3.8462    | 3.8827    |
| Diphenhydramine           | 3.5479   | 3.5310    | 3.5636    |
| Lidocaine prilocaine      | 3.4114   | 3.3841    | 3.4403    |
| Dexamethasone             | 3.0949   | 3.0809    | 3.1102    |
| Promethazine              | 2.8213   | 2.8067    | 2.8358    |
| Metoclopramide            | 2.7527   | 2.7382    | 2.7673    |
| Ketorolac                 | 2.7080   | 2.6939    | 2.7214    |
| Cefotaxime                | 2.6960   | 2.6794    | 2.7125    |
| Calcium gluconate         | 2.6932   | 2.6770    | 2.7094    |
| Prednisolone              | 2.6815   | 2.6673    | 2.6951    |
| Ipratropium               | 2.5705   | 2.5572    | 2.5831    |
| Vancomycin                | 2.5602   | 2.5477    | 2.5719    |
| Rocuronium                | 2.5251   | 2.5126    | 2.5374    |
| Bacitracin                | 2.4278   | 2.4075    | 2.4478    |
| Clindamycin               | 2.4258   | 2.4135    | 2.4392    |
| Glycopyrrolate            | 2.3598   | 2.3481    | 2.3723    |
| Levalbuterol              | 2.3251   | 2.3116    | 2.3392    |
| Acetaminophen codeine     | 2.2798   | 2.2662    | 2.2927    |
| Azithromycin              | 2.2722   | 2.2584    | 2.2849    |
| Furosemide                | 2.2063   | 2.1954    | 2.2167    |
| Bupivacaine               | 2.1625   | 2.1496    | 2.1760    |
| Lorazepam                 | 2.1326   | 2.1197    | 2.1442    |
| Oxytocin                  | 2.1101   | 2.1015    | 2.1189    |
| Docusate                  | 2.0829   | 2.0714    | 2.0954    |
| Sodium bicarbonate        | 1.9117   | 1.8987    | 1.9247    |
| Famotidine                | 1.9043   | 1.8932    | 1.9164    |
| Hydrocodone acetaminophen | 1.9021   | 1.8901    | 1.9140    |
| Epinephrine               | 1.8896   | 1.8769    | 1.9019    |
| Neostigmine               | 1.8181   | 1.8076    | 1.8292    |
| Magnesium                 | 1.8079   | 1.7966    | 1.8191    |
| Budesonide                | 1.7875   | 1.7753    | 1.7991    |
| Nystatin                  | 1.7684   | 1.7551    | 1.7821    |
| Meperidine                | 1.5186   | 1.5078    | 1.5304    |
| Succinylcholine chloride  | 1.4648   | 1.4533    | 1.4755    |
| Glycerin supplement       | 1.4441   | 1.4318    | 1.4563    |
| Oxycodone asprin          | 1.4261   | 1.4139    | 1.4381    |
| Montelukast               | 1.3879   | 1.3774    | 1.3988    |
| Bupivacaine epinephrine   | 1.3571   | 1.3465    | 1.3673    |

|                                 |        |        |        |
|---------------------------------|--------|--------|--------|
| Iron sulfate                    | 1.3472 | 1.3378 | 1.3572 |
| Lansoprazole                    | 1.3459 | 1.3352 | 1.3567 |
| Trimethoprim sulfamethoxazole   | 1.2482 | 1.2382 | 1.2578 |
| Atropine                        | 1.2013 | 1.1923 | 1.2104 |
| Fluticasone                     | 1.1534 | 1.1438 | 1.1633 |
| Polyethylene glycol electrolyte | 1.1256 | 1.1160 | 1.1358 |
| Vecuronium                      | 1.1062 | 1.0966 | 1.1155 |
| Lidocaine cardiac               | 1.0816 | 1.0672 | 1.0951 |
| Simethicone                     | 1.0598 | 1.0476 | 1.0718 |
| Albumin                         | 1.0432 | 1.0355 | 1.0514 |
| Metronidazole                   | 0.9892 | 0.9804 | 0.9980 |
| Lidocaine epinephrine           | 0.9888 | 0.9800 | 0.9975 |
| Hydromorphone                   | 0.9887 | 0.9798 | 0.9971 |
| Ampicillin sulbactam            | 0.9867 | 0.9763 | 0.9967 |
| Immune globulin hepatitis b     | 0.9741 | 0.9524 | 0.9979 |
| Dopamine                        | 0.9528 | 0.9459 | 0.9602 |
| Prednisone                      | 0.9471 | 0.9391 | 0.9554 |
| Amoxicillin                     | 0.9451 | 0.9357 | 0.9549 |
| Phenylephrine                   | 0.9449 | 0.9358 | 0.9540 |
| Potassium phosphate             | 0.9427 | 0.9344 | 0.9508 |
| Insulin                         | 0.9112 | 0.9047 | 0.9177 |
| Caffeine                        | 0.9054 | 0.8984 | 0.9122 |
| Palivizumab                     | 0.9043 | 0.8965 | 0.9126 |
| Hydrocortisone                  | 0.8661 | 0.8571 | 0.8749 |
| Ioversol                        | 0.8322 | 0.8238 | 0.8417 |
| Phenobarbital                   | 0.8253 | 0.8168 | 0.8332 |
| Benzocaine                      | 0.8149 | 0.8071 | 0.8228 |
| Cefuroxime                      | 0.8088 | 0.8004 | 0.8175 |
| Dolasetron                      | 0.8004 | 0.7927 | 0.8084 |
| Piperacillin tazobactam         | 0.7983 | 0.7900 | 0.8060 |
| Neomycin polymixin bacitracin   | 0.7785 | 0.7628 | 0.7949 |
| Mupirocin                       | 0.7781 | 0.7679 | 0.7886 |
| Butorphanol                     | 0.7702 | 0.7630 | 0.7776 |
| Bisacodyl                       | 0.7536 | 0.7459 | 0.7628 |
| Chloral                         | 0.7309 | 0.7232 | 0.7388 |
| Amoxicillin clavulanate         | 0.7150 | 0.7066 | 0.7230 |
| Potassium acetate               | 0.7057 | 0.6972 | 0.7139 |
| Sodium acetate                  | 0.7036 | 0.6963 | 0.7114 |
| Cefoxitin                       | 0.6913 | 0.6848 | 0.6985 |
| Fluconazole                     | 0.6871 | 0.6797 | 0.6943 |
| Oxycodone                       | 0.6656 | 0.6546 | 0.6768 |
| Pantoprazole                    | 0.6516 | 0.6444 | 0.6596 |
| Acyclovir                       | 0.6514 | 0.6431 | 0.6597 |
| Thrombin                        | 0.6414 | 0.6353 | 0.6475 |
| Naloxone                        | 0.6364 | 0.6235 | 0.6481 |
| Aluminum magnesium hydroxide    | 0.6240 | 0.6144 | 0.6343 |
| Diazepam                        | 0.6160 | 0.6086 | 0.6231 |
| Ketamine                        | 0.6112 | 0.6041 | 0.6188 |
| Cyclopentolate phenylephrine    | 0.6055 | 0.5991 | 0.6118 |
| Nalbuphine                      | 0.5919 | 0.5843 | 0.6004 |
| Hydroxyzine                     | 0.5898 | 0.5830 | 0.5974 |
| Polymyxin bacitracin            | 0.5896 | 0.5740 | 0.6057 |
| Calcium chloride                | 0.5885 | 0.5825 | 0.5941 |
| Ceftazidime                     | 0.5675 | 0.5605 | 0.5744 |
| Cefepime                        | 0.5625 | 0.5563 | 0.5697 |



|                            |        |        |        |
|----------------------------|--------|--------|--------|
| Penicillin G               | 0.5604 | 0.5520 | 0.5685 |
| L-cysteine                 | 0.5114 | 0.5045 | 0.5179 |
| Magnesium hydroxide        | 0.5059 | 0.4995 | 0.5122 |
| Risperidone                | 0.4903 | 0.4844 | 0.4970 |
| Tobramycin                 | 0.4897 | 0.4827 | 0.4973 |
| Sodium phosphate           | 0.4896 | 0.4830 | 0.4959 |
| Beractant                  | 0.4884 | 0.4818 | 0.4950 |
| Ropivacaine                | 0.4723 | 0.4661 | 0.4791 |
| Aspirin                    | 0.4641 | 0.4583 | 0.4702 |
| Quetiapine fumarate        | 0.4544 | 0.4485 | 0.4603 |
| Fluoxetine                 | 0.4362 | 0.4308 | 0.4416 |
| Sodium citrate             | 0.4290 | 0.4232 | 0.4349 |
| Ephedrine                  | 0.4288 | 0.4225 | 0.4347 |
| Divalproex sodium          | 0.4258 | 0.4204 | 0.4316 |
| Chlorhexidine              | 0.4213 | 0.4157 | 0.4275 |
| Oxcarbazepine              | 0.4198 | 0.4138 | 0.4263 |
| Mannitol                   | 0.4196 | 0.4144 | 0.4247 |
| Zolpidem                   | 0.4169 | 0.4107 | 0.4231 |
| Clonidine                  | 0.4157 | 0.4098 | 0.4216 |
| Vaccine: pneumococcal      | 0.4110 | 0.4056 | 0.4167 |
| Cetirizine                 | 0.3999 | 0.3943 | 0.4061 |
| Fentanyl bupivacaine       | 0.3988 | 0.3919 | 0.4054 |
| Ciprofloxacin              | 0.3883 | 0.3824 | 0.3949 |
| Fosphenytoin               | 0.3859 | 0.3803 | 0.3912 |
| Mivacurium                 | 0.3849 | 0.3788 | 0.3911 |
| Vitamin B9                 | 0.3827 | 0.3773 | 0.3881 |
| Alteplase                  | 0.3818 | 0.3765 | 0.3870 |
| Lactobacillus              | 0.3785 | 0.3724 | 0.3845 |
| Senna                      | 0.3761 | 0.3704 | 0.3824 |
| Lanolin                    | 0.3715 | 0.3626 | 0.3805 |
| Cephalexin                 | 0.3699 | 0.3641 | 0.3759 |
| Oxymetazoline              | 0.3675 | 0.3619 | 0.3730 |
| Epoetin                    | 0.3670 | 0.3616 | 0.3725 |
| Levetiracetam              | 0.3640 | 0.3585 | 0.3694 |
| Senna docusate             | 0.3596 | 0.3538 | 0.3657 |
| Sertraline                 | 0.3556 | 0.3497 | 0.3614 |
| Aripiprazole               | 0.3525 | 0.3474 | 0.3575 |
| Loratadine                 | 0.3524 | 0.3469 | 0.3578 |
| Immune globulin human ig   | 0.3512 | 0.3458 | 0.3568 |
| Escitalopram oxalate       | 0.3452 | 0.3396 | 0.3506 |
| Poractant                  | 0.3449 | 0.3390 | 0.3508 |
| Zinc                       | 0.3416 | 0.3358 | 0.3471 |
| Indomethacin               | 0.3394 | 0.3347 | 0.3443 |
| Milrinone                  | 0.3376 | 0.3339 | 0.3415 |
| Propoxyphene acetaminophen | 0.3345 | 0.3292 | 0.3403 |
| Levocarnitine              | 0.3299 | 0.3246 | 0.3351 |
| Fluticasone salmeterol     | 0.3252 | 0.3193 | 0.3304 |
| Spirolactone               | 0.3215 | 0.3167 | 0.3265 |
| Ipratropium albuterol      | 0.3170 | 0.3115 | 0.3222 |
| Granisetron                | 0.3124 | 0.3069 | 0.3184 |
| Topiramate                 | 0.3117 | 0.3063 | 0.3169 |
| Gadopentetate              | 0.3100 | 0.3045 | 0.3158 |
| Digoxin                    | 0.3024 | 0.2976 | 0.3075 |
| Pancuronium                | 0.3023 | 0.2972 | 0.3075 |
| Cisatracurium              | 0.3019 | 0.2962 | 0.3071 |

|                                              |        |        |        |
|----------------------------------------------|--------|--------|--------|
| Levofloxacin                                 | 0.2998 | 0.2949 | 0.3049 |
| Enoxaparin                                   | 0.2993 | 0.2944 | 0.3044 |
| Phenytoin                                    | 0.2990 | 0.2940 | 0.3043 |
| Filgrastim                                   | 0.2961 | 0.2912 | 0.3004 |
| Valproic acid                                | 0.2926 | 0.2875 | 0.2978 |
| Levothyroxine                                | 0.2898 | 0.2847 | 0.2952 |
| Methylphenidate                              | 0.2887 | 0.2841 | 0.2940 |
| Vincristine                                  | 0.2871 | 0.2823 | 0.2916 |
| Physostigmine                                | 0.2827 | 0.2705 | 0.2949 |
| Nafcillin                                    | 0.2814 | 0.2761 | 0.2863 |
| Dornase                                      | 0.2793 | 0.2751 | 0.2833 |
| Iron sucrose                                 | 0.2792 | 0.2678 | 0.2912 |
| Protriptyline                                | 0.2748 | 0.2630 | 0.2870 |
| Vaccine: influenza                           | 0.2736 | 0.2686 | 0.2788 |
| Trazodone                                    | 0.2732 | 0.2684 | 0.2780 |
| Enalapril                                    | 0.2720 | 0.2674 | 0.2772 |
| Calcium carbonate                            | 0.2691 | 0.2631 | 0.2741 |
| Cefdinir                                     | 0.2670 | 0.2620 | 0.2727 |
| Vaccine: haemophilus b                       | 0.2667 | 0.2623 | 0.2710 |
| Mesna                                        | 0.2663 | 0.2622 | 0.2702 |
| Lamotrigine                                  | 0.2658 | 0.2612 | 0.2710 |
| Calfactant                                   | 0.2626 | 0.2579 | 0.2675 |
| Diatrizoate meglumine and diatrizoate sodium | 0.2578 | 0.2533 | 0.2624 |
| Chlorothiazide                               | 0.2573 | 0.2529 | 0.2618 |
| Atracurium                                   | 0.2565 | 0.2520 | 0.2607 |
| Pentobarbital                                | 0.2541 | 0.2492 | 0.2591 |
| Meropenem                                    | 0.2533 | 0.2486 | 0.2580 |
| Clonazepam                                   | 0.2531 | 0.2486 | 0.2577 |
| Methotrexate                                 | 0.2510 | 0.2460 | 0.2553 |
| Sucralfate                                   | 0.2498 | 0.2450 | 0.2548 |
| Cyclophosphamide                             | 0.2462 | 0.2425 | 0.2500 |
| Guaifenesin                                  | 0.2439 | 0.2390 | 0.2489 |
| Hydrocortisone sodium succinate              | 0.2438 | 0.2393 | 0.2486 |
| Terbutaline                                  | 0.2410 | 0.2363 | 0.2459 |
| Dobutamine                                   | 0.2408 | 0.2365 | 0.2451 |
| Omeprazole                                   | 0.2379 | 0.2332 | 0.2431 |
| Acetylcysteine                               | 0.2376 | 0.2328 | 0.2426 |
| Ferrous sulfate                              | 0.2376 | 0.2323 | 0.2423 |
| Ursodiol                                     | 0.2372 | 0.2327 | 0.2416 |
| Methadone                                    | 0.2370 | 0.2325 | 0.2414 |
| Pramoxine                                    | 0.2356 | 0.2309 | 0.2403 |
| Triamcinolone                                | 0.2345 | 0.2298 | 0.2392 |
| Sevoflurane                                  | 0.2334 | 0.2284 | 0.2383 |
| Mometasone                                   | 0.2302 | 0.2253 | 0.2349 |
| Silver sulfadiazine                          | 0.2268 | 0.2227 | 0.2308 |
| Labetalol                                    | 0.2220 | 0.2173 | 0.2266 |
| Trimethobenzamide                            | 0.2117 | 0.2071 | 0.2161 |
| Carbamazepine                                | 0.2077 | 0.2034 | 0.2124 |
| Clotrimazole                                 | 0.2030 | 0.1987 | 0.2076 |
| Oxacillin                                    | 0.2028 | 0.1986 | 0.2071 |
| Vitamin D                                    | 0.2026 | 0.1983 | 0.2068 |
| Dinoprostone                                 | 0.2008 | 0.1964 | 0.2047 |
| Tetracaine                                   | 0.2000 | 0.1960 | 0.2040 |
| Papaverine                                   | 0.1990 | 0.1949 | 0.2030 |
| Baclofen                                     | 0.1983 | 0.1940 | 0.2026 |

|                                                             |        |        |        |
|-------------------------------------------------------------|--------|--------|--------|
| Tropicamide                                                 | 0.1975 | 0.1930 | 0.2019 |
| Etoposide                                                   | 0.1964 | 0.1927 | 0.2000 |
| Vaccine: diphtheria, tetanus                                | 0.1912 | 0.1872 | 0.1951 |
| Misoprostol                                                 | 0.1910 | 0.1867 | 0.1954 |
| Oxybutynin                                                  | 0.1872 | 0.1837 | 0.1908 |
| Medroxyprogesterone                                         | 0.1869 | 0.1828 | 0.1908 |
| Cytarabine                                                  | 0.1868 | 0.1828 | 0.1903 |
| Dextroamphetamine amphetamine                               | 0.1841 | 0.1803 | 0.1880 |
| Nitroprusside                                               | 0.1820 | 0.1785 | 0.1852 |
| Naproxen                                                    | 0.1802 | 0.1761 | 0.1845 |
| Olanzapine                                                  | 0.1792 | 0.1753 | 0.1832 |
| Etomidate                                                   | 0.1785 | 0.1746 | 0.1824 |
| Povidone iodine                                             | 0.1776 | 0.1735 | 0.1818 |
| Gadolinium                                                  | 0.1770 | 0.1727 | 0.1808 |
| Benzotropine                                                | 0.1761 | 0.1712 | 0.1807 |
| Esomeprazole                                                | 0.1757 | 0.1716 | 0.1795 |
| Amlodipine                                                  | 0.1750 | 0.1712 | 0.1789 |
| Nifedipine                                                  | 0.1743 | 0.1702 | 0.1781 |
| Methylergon                                                 | 0.1727 | 0.1681 | 0.1769 |
| Iohexol                                                     | 0.1725 | 0.1685 | 0.1765 |
| Vaccine: diphtheria, tetanus, pertussis, hepatitis b, polio | 0.1706 | 0.1671 | 0.1744 |
| Haloperidol                                                 | 0.1698 | 0.1657 | 0.1739 |
| Vaccine: haemophilus b, hepatitis b                         | 0.1685 | 0.1599 | 0.1762 |
| Ticarcillin clavulanate                                     | 0.1683 | 0.1642 | 0.1724 |
| Cefotetan                                                   | 0.1673 | 0.1633 | 0.1715 |
| Gabapentin                                                  | 0.1647 | 0.1607 | 0.1691 |
| Selenium                                                    | 0.1645 | 0.1600 | 0.1690 |
| Silver nitrate                                              | 0.1641 | 0.1570 | 0.1718 |
| Bupropion                                                   | 0.1636 | 0.1598 | 0.1672 |
| Lactulose                                                   | 0.1634 | 0.1596 | 0.1673 |
| Vaccine: diphtheria, tetanus, pertussis                     | 0.1624 | 0.1585 | 0.1661 |
| Sufentanil                                                  | 0.1612 | 0.1575 | 0.1651 |
| Ziprasidone                                                 | 0.1597 | 0.1560 | 0.1634 |
| Neomycin polymyxin                                          | 0.1584 | 0.1541 | 0.1629 |
| Doxycycline                                                 | 0.1583 | 0.1546 | 0.1620 |
| Guaifenesin dextromethorphan                                | 0.1579 | 0.1540 | 0.1620 |
| Amphotericin b                                              | 0.1577 | 0.1539 | 0.1615 |
| Captopril                                                   | 0.1575 | 0.1541 | 0.1610 |
| Leucovorin                                                  | 0.1572 | 0.1537 | 0.1609 |
| Thiopental                                                  | 0.1565 | 0.1526 | 0.1606 |
| Aprotinin                                                   | 0.1555 | 0.1527 | 0.1583 |
| Immune globulin rho d                                       | 0.1540 | 0.1506 | 0.1579 |
| Aminophylline                                               | 0.1536 | 0.1497 | 0.1574 |
| Prochlorperazine                                            | 0.1510 | 0.1472 | 0.1548 |
| Cyclopentolate                                              | 0.1498 | 0.1462 | 0.1538 |
| Penicillin v                                                | 0.1479 | 0.1442 | 0.1517 |
| Vaccine: polio                                              | 0.1465 | 0.1431 | 0.1499 |
| Desmopressin                                                | 0.1451 | 0.1414 | 0.1488 |
| Acetazolamide                                               | 0.1437 | 0.1403 | 0.1475 |
| Doxorubicin                                                 | 0.1437 | 0.1405 | 0.1470 |
| Alprostadil                                                 | 0.1436 | 0.1405 | 0.1470 |
| Vitamin a                                                   | 0.1410 | 0.1375 | 0.1445 |
| Hydralazine                                                 | 0.1366 | 0.1331 | 0.1399 |
| Betamethasone                                               | 0.1348 | 0.1316 | 0.1377 |

|                                  |        |        |        |
|----------------------------------|--------|--------|--------|
| Propranolol                      | 0.1330 | 0.1294 | 0.1365 |
| Remifentanyl                     | 0.1321 | 0.1288 | 0.1355 |
| Pseudoephedrine                  | 0.1316 | 0.1283 | 0.1353 |
| Ofloxacin                        | 0.1301 | 0.1268 | 0.1336 |
| Lithium                          | 0.1299 | 0.1268 | 0.1334 |
| Rifampin                         | 0.1295 | 0.1261 | 0.1328 |
| Atomoxetine                      | 0.1259 | 0.1223 | 0.1291 |
| Phenol                           | 0.1257 | 0.1221 | 0.1287 |
| Proparacaine                     | 0.1250 | 0.1219 | 0.1284 |
| Vaccine: rubella                 | 0.1250 | 0.1215 | 0.1286 |
| Tacrolimus                       | 0.1235 | 0.1201 | 0.1267 |
| Zolmitriptan                     | 0.1223 | 0.1190 | 0.1257 |
| Protamine sulfate                | 0.1222 | 0.1197 | 0.1246 |
| Iodixanol                        | 0.1221 | 0.1189 | 0.1253 |
| Methylene blue                   | 0.1219 | 0.1189 | 0.1248 |
| Nitroglycerin                    | 0.1198 | 0.1166 | 0.1234 |
| Benzoin tincture                 | 0.1183 | 0.1150 | 0.1219 |
| Kanamycin                        | 0.1172 | 0.1139 | 0.1206 |
| Vitamin e                        | 0.1142 | 0.1109 | 0.1174 |
| Mercaptopurine                   | 0.1134 | 0.1098 | 0.1166 |
| Loperamide                       | 0.1130 | 0.1097 | 0.1162 |
| Dexmedetomidine                  | 0.1123 | 0.1093 | 0.1151 |
| Protamine                        | 0.1108 | 0.1085 | 0.1131 |
| Technetium-99m unspecified       | 0.1105 | 0.1072 | 0.1139 |
| Vitamin c                        | 0.1096 | 0.1063 | 0.1127 |
| Clarithromycin                   | 0.1082 | 0.1049 | 0.1115 |
| Theophylline                     | 0.1044 | 0.1013 | 0.1074 |
| Codeine                          | 0.1039 | 0.1005 | 0.1072 |
| Nicotine                         | 0.1037 | 0.1006 | 0.1070 |
| Edrophonium                      | 0.1032 | 0.1003 | 0.1065 |
| Linezolid                        | 0.1021 | 0.0992 | 0.1052 |
| Oseltamivir                      | 0.1006 | 0.0978 | 0.1035 |
| Adenosine                        | 0.1002 | 0.0972 | 0.1037 |
| Mycophenolate                    | 0.0999 | 0.0970 | 0.1025 |
| Cholestyramine light             | 0.0995 | 0.0964 | 0.1028 |
| Amikacin                         | 0.0988 | 0.0955 | 0.1019 |
| Imipenem                         | 0.0976 | 0.0946 | 0.1008 |
| Miconazole                       | 0.0974 | 0.0939 | 0.1003 |
| Salmeterol xinafoate fluticasone | 0.0922 | 0.0892 | 0.0953 |
| Droperidol                       | 0.0910 | 0.0879 | 0.0937 |
| Chlorpromazine                   | 0.0905 | 0.0875 | 0.0935 |
| Ifosfamide                       | 0.0889 | 0.0861 | 0.0915 |
| Cisplatin                        | 0.0879 | 0.0853 | 0.0905 |
| Moxifloxacin                     | 0.0864 | 0.0833 | 0.0898 |
| Cyproheptadine                   | 0.0860 | 0.0831 | 0.0888 |
| Citalopram                       | 0.0831 | 0.0803 | 0.0860 |
| Venlafaxine                      | 0.0831 | 0.0805 | 0.0858 |
| Allopurinol                      | 0.0827 | 0.0804 | 0.0848 |
| Warfarin                         | 0.0816 | 0.0789 | 0.0841 |
| Mepivacaine                      | 0.0814 | 0.0784 | 0.0847 |
| Esmolol                          | 0.0811 | 0.0783 | 0.0836 |
| Barium sulfate                   | 0.0807 | 0.0777 | 0.0836 |
| Amitriptyline                    | 0.0803 | 0.0776 | 0.0830 |
| Chloroprocaine                   | 0.0803 | 0.0746 | 0.0856 |
| Darbepoetin albumin              | 0.0803 | 0.0777 | 0.0831 |

|                                                   |        |        |        |
|---------------------------------------------------|--------|--------|--------|
| Ertapenem                                         | 0.0800 | 0.0774 | 0.0827 |
| Iron                                              | 0.0799 | 0.0772 | 0.0826 |
| Tromethamine                                      | 0.0799 | 0.0769 | 0.0827 |
| Hyoscyamine                                       | 0.0798 | 0.0772 | 0.0824 |
| Flumazenil                                        | 0.0795 | 0.0766 | 0.0822 |
| Magnesia                                          | 0.0792 | 0.0763 | 0.0821 |
| Dibucaine                                         | 0.0791 | 0.0756 | 0.0823 |
| Chloroethane                                      | 0.0786 | 0.0759 | 0.0816 |
| Mesalamine                                        | 0.0783 | 0.0762 | 0.0806 |
| Norepinephrine                                    | 0.0778 | 0.0753 | 0.0803 |
| Polymyxin trimethoprim                            | 0.0771 | 0.0736 | 0.0807 |
| Scopolamine                                       | 0.0770 | 0.0741 | 0.0795 |
| Nitrofurantoin                                    | 0.0766 | 0.0738 | 0.0791 |
| Cyclosporine                                      | 0.0748 | 0.0724 | 0.0773 |
| Polymyxin                                         | 0.0746 | 0.0720 | 0.0772 |
| Cefprozil                                         | 0.0742 | 0.0714 | 0.0768 |
| Atenolol                                          | 0.0740 | 0.0715 | 0.0765 |
| Isoflurane                                        | 0.0739 | 0.0714 | 0.0767 |
| Aminocaproic acid                                 | 0.0738 | 0.0715 | 0.0760 |
| Pentamidine                                       | 0.0733 | 0.0707 | 0.0758 |
| Beclomethasone                                    | 0.0731 | 0.0705 | 0.0759 |
| Physiosol                                         | 0.0730 | 0.0705 | 0.0753 |
| Pancrelipase                                      | 0.0719 | 0.0697 | 0.0742 |
| Cyclobenzaprine                                   | 0.0716 | 0.0692 | 0.0742 |
| Flunisolide                                       | 0.0713 | 0.0688 | 0.0738 |
| Paroxetine                                        | 0.0713 | 0.0685 | 0.0741 |
| Magnesium carbonate                               | 0.0712 | 0.0686 | 0.0739 |
| Iopamidol                                         | 0.0711 | 0.0686 | 0.0737 |
| Diatrizoate                                       | 0.0705 | 0.0679 | 0.0731 |
| Hydroxyurea                                       | 0.0701 | 0.0676 | 0.0725 |
| Mirtazapine                                       | 0.0701 | 0.0676 | 0.0727 |
| Lisinopril                                        | 0.0698 | 0.0671 | 0.0723 |
| Hyaluronidase                                     | 0.0689 | 0.0663 | 0.0715 |
| Iothalamate                                       | 0.0689 | 0.0664 | 0.0713 |
| Ticarcillin                                       | 0.0680 | 0.0660 | 0.0710 |
| Metoprolol                                        | 0.0678 | 0.0653 | 0.0703 |
| Calamine pramoxine                                | 0.0671 | 0.0636 | 0.0708 |
| Pseudoephedrine carbinoxamine<br>dextromethorphan | 0.0669 | 0.0645 | 0.0695 |
| Zidovudine                                        | 0.0663 | 0.0615 | 0.0710 |
| Gentian violet                                    | 0.0657 | 0.0603 | 0.0713 |
| Voriconazole                                      | 0.0648 | 0.0625 | 0.0673 |
| Nystatin triamcinolone                            | 0.0645 | 0.0621 | 0.0671 |
| Metformin                                         | 0.0642 | 0.0617 | 0.0668 |
| Cimetidine                                        | 0.0637 | 0.0611 | 0.0664 |
| Bumetanide                                        | 0.0631 | 0.0606 | 0.0654 |
| Metolazone                                        | 0.0628 | 0.0605 | 0.0652 |
| Phenazopyridine                                   | 0.0623 | 0.0598 | 0.0648 |
| Glucagon                                          | 0.0620 | 0.0593 | 0.0645 |
| Fexofenadine                                      | 0.0603 | 0.0579 | 0.0626 |
| Vasopressin                                       | 0.0603 | 0.0581 | 0.0626 |
| Iron fumarate docusate sodium                     | 0.0599 | 0.0574 | 0.0623 |
| Pseudoephedrine brompheniramine                   | 0.0597 | 0.0574 | 0.0623 |
| Nicardipine                                       | 0.0591 | 0.0569 | 0.0615 |
| Sodium lactate                                    | 0.0582 | 0.0555 | 0.0610 |

|                                     |        |        |        |
|-------------------------------------|--------|--------|--------|
| Hespan                              | 0.0574 | 0.0551 | 0.0596 |
| Pegaspargase                        | 0.0572 | 0.0553 | 0.0593 |
| Vitamin b6                          | 0.0559 | 0.0538 | 0.0581 |
| Neomycin                            | 0.0541 | 0.0512 | 0.0573 |
| Tramadol                            | 0.0537 | 0.0515 | 0.0564 |
| Duloxetine                          | 0.0526 | 0.0503 | 0.0548 |
| Dapsone                             | 0.0523 | 0.0501 | 0.0545 |
| Vaccine: measles, mumps, rubella    | 0.0521 | 0.0499 | 0.0543 |
| Docosate sodium casanthranol*       | 0.0519 | 0.0499 | 0.0543 |
| Amiodarone                          | 0.0517 | 0.0495 | 0.0539 |
| Guanfacine                          | 0.0517 | 0.0495 | 0.0541 |
| Cefaclor                            | 0.0500 | 0.0469 | 0.0533 |
| Azathioprine                        | 0.0498 | 0.0478 | 0.0519 |
| Alprazolam                          | 0.0476 | 0.0455 | 0.0496 |
| Sulfacetamide op                    | 0.0472 | 0.0446 | 0.0498 |
| Ciprofloxacin dexameth otic         | 0.0468 | 0.0449 | 0.0490 |
| Carboprost tromethamine             | 0.0467 | 0.0445 | 0.0488 |
| Cosyntropin                         | 0.0463 | 0.0442 | 0.0486 |
| Tobramycin dexamethasone ophthalmic | 0.0463 | 0.0440 | 0.0488 |
| Vinblastine                         | 0.0463 | 0.0442 | 0.0484 |
| Temazepam                           | 0.0451 | 0.0430 | 0.0470 |
| Vitamin b1                          | 0.0451 | 0.0431 | 0.0472 |
| Daunorubicin                        | 0.0450 | 0.0431 | 0.0469 |
| Hydrochlorothiazide                 | 0.0445 | 0.0424 | 0.0465 |
| Psyllium                            | 0.0441 | 0.0420 | 0.0462 |
| Dicyclomine                         | 0.0440 | 0.0419 | 0.0462 |
| Megestrol                           | 0.0434 | 0.0413 | 0.0455 |
| Vaccine: tetanus                    | 0.0432 | 0.0412 | 0.0453 |
| Ammonium chloride                   | 0.0426 | 0.0405 | 0.0445 |
| Vacc diph teta pertussis polio      | 0.0416 | 0.0367 | 0.0463 |
| Peptamen                            | 0.0415 | 0.0397 | 0.0433 |
| Guaifenesin codeine                 | 0.0409 | 0.0391 | 0.0428 |
| Neomycin polymyxin hydrocortisone   | 0.0406 | 0.0386 | 0.0426 |
| Permethrin                          | 0.0406 | 0.0386 | 0.0426 |
| Vitamin B12                         | 0.0405 | 0.0386 | 0.0427 |
| Dextroamphet                        | 0.0401 | 0.0382 | 0.0418 |
| Factor viia                         | 0.0399 | 0.0381 | 0.0419 |
| Carboplatin                         | 0.0393 | 0.0373 | 0.0413 |
| Fludrocortisone                     | 0.0388 | 0.0369 | 0.0407 |
| Valganciclovir                      | 0.0380 | 0.0364 | 0.0396 |
| Caspofungin                         | 0.0372 | 0.0354 | 0.0391 |
| Aztreonam                           | 0.0370 | 0.0352 | 0.0389 |
| Dactinomycin                        | 0.0367 | 0.0350 | 0.0383 |
| Hydroxychloroquine                  | 0.0349 | 0.0332 | 0.0366 |
| Dexamethasone neomycin              | 0.0345 | 0.0327 | 0.0362 |
| Asparaginase                        | 0.0340 | 0.0323 | 0.0360 |
| Quetiapine                          | 0.0339 | 0.0321 | 0.0357 |
| Diphenoxylate atropine              | 0.0336 | 0.0318 | 0.0353 |
| Sildenafil                          | 0.0332 | 0.0312 | 0.0350 |
| Ganciclovir                         | 0.0330 | 0.0315 | 0.0345 |
| Irinotecan                          | 0.0327 | 0.0312 | 0.0345 |
| Dexmethylphenidate                  | 0.0324 | 0.0307 | 0.0340 |
| Iron gluconate                      | 0.0322 | 0.0306 | 0.0339 |
| Celecoxib                           | 0.0316 | 0.0300 | 0.0333 |

|                                                          |        |        |        |
|----------------------------------------------------------|--------|--------|--------|
| Phenylpropanolamine chlorpheniramine<br>dextromethorphan | 0.0315 | 0.0299 | 0.0333 |
| Calcium acetate                                          | 0.0314 | 0.0296 | 0.0332 |
| Octreotide                                               | 0.0312 | 0.0295 | 0.0329 |
| Dihydroergotamine                                        | 0.0311 | 0.0297 | 0.0326 |
| Hydrocortisone polyethylene glycol                       | 0.0306 | 0.0290 | 0.0322 |
| Buspirone                                                | 0.0304 | 0.0287 | 0.0319 |
| Isoproterenol                                            | 0.0303 | 0.0287 | 0.0319 |
| Dextran                                                  | 0.0300 | 0.0283 | 0.0319 |
| Dronabinol                                               | 0.0294 | 0.0277 | 0.0310 |
| Bleomycin                                                | 0.0285 | 0.0268 | 0.0301 |
| Clorazepate                                              | 0.0281 | 0.0265 | 0.0298 |
| Cromolyn                                                 | 0.0277 | 0.0259 | 0.0293 |
| Imipramine                                               | 0.0277 | 0.0259 | 0.0295 |
| Nitrofurantoin                                           | 0.0276 | 0.0259 | 0.0292 |
| Modafinil                                                | 0.0275 | 0.0260 | 0.0292 |
| Cefpodoxime                                              | 0.0273 | 0.0257 | 0.0290 |
| Ceftizoxime                                              | 0.0269 | 0.0253 | 0.0285 |
| Nitrous oxide                                            | 0.0268 | 0.0251 | 0.0285 |
| Pegfilgrastim                                            | 0.0267 | 0.0251 | 0.0282 |
| Ketoconazole                                             | 0.0266 | 0.0250 | 0.0282 |
| Donnatal                                                 | 0.0260 | 0.0245 | 0.0276 |
| Tizanidine                                               | 0.0259 | 0.0243 | 0.0275 |
| Ciprofloxacin hc otic                                    | 0.0258 | 0.0243 | 0.0275 |
| Methocarbamol                                            | 0.0258 | 0.0243 | 0.0274 |
| Metaproterenol                                           | 0.0256 | 0.0238 | 0.0276 |
| Alfentanil                                               | 0.0252 | 0.0237 | 0.0268 |
| Glutamine                                                | 0.0249 | 0.0232 | 0.0263 |
| Thioguanine                                              | 0.0249 | 0.0233 | 0.0264 |
| Gatifloxacin                                             | 0.0238 | 0.0223 | 0.0253 |
| Bethanechol                                              | 0.0237 | 0.0223 | 0.0254 |
| Valacyclovir                                             | 0.0236 | 0.0221 | 0.0252 |
| Promethazine codeine                                     | 0.0235 | 0.0219 | 0.0250 |
| Benzonatate                                              | 0.0230 | 0.0215 | 0.0245 |
| Sumatriptan                                              | 0.0230 | 0.0216 | 0.0244 |
| Sirolimus                                                | 0.0225 | 0.0210 | 0.0239 |
| Infliximab                                               | 0.0224 | 0.0209 | 0.0238 |
| Carbamide peroxide otic                                  | 0.0223 | 0.0207 | 0.0240 |
| Ethacrynic acid                                          | 0.0223 | 0.0208 | 0.0237 |
| Aprepitant                                               | 0.0222 | 0.0208 | 0.0237 |
| Erythromycin sulfisoxazole                               | 0.0222 | 0.0207 | 0.0236 |
| Amphetamine complex                                      | 0.0221 | 0.0206 | 0.0237 |
| Piperacillin                                             | 0.0221 | 0.0207 | 0.0236 |
| Felbamate                                                | 0.0219 | 0.0205 | 0.0235 |
| Pimecrolimus                                             | 0.0217 | 0.0202 | 0.0231 |
| Minocycline                                              | 0.0215 | 0.0202 | 0.0230 |
| Isradipine                                               | 0.0212 | 0.0198 | 0.0227 |
| Estrogen conjugated                                      | 0.0209 | 0.0195 | 0.0224 |
| Arginine                                                 | 0.0208 | 0.0194 | 0.0221 |
| Verapamil                                                | 0.0208 | 0.0194 | 0.0221 |
| Caffeine sodium benzoate                                 | 0.0207 | 0.0195 | 0.0220 |
| Sincalide                                                | 0.0205 | 0.0192 | 0.0219 |
| Phenylpropanolamine brompheniramine                      | 0.0204 | 0.0192 | 0.0218 |
| Cephadrine                                               | 0.0199 | 0.0188 | 0.0210 |
| Sodium ferric gluconate complex                          | 0.0195 | 0.0181 | 0.0208 |

|                                                     |        |        |        |
|-----------------------------------------------------|--------|--------|--------|
| Aspirin codeine                                     | 0.0193 | 0.0164 | 0.0223 |
| Phentolamine                                        | 0.0193 | 0.0179 | 0.0208 |
| Phenylephrine chlorpheniramine hydrocodone          | 0.0192 | 0.0178 | 0.0206 |
| Iothalamate meglumine                               | 0.0191 | 0.0176 | 0.0205 |
| Metrizamide                                         | 0.0191 | 0.0176 | 0.0206 |
| Isoniazid                                           | 0.0190 | 0.0175 | 0.0205 |
| Oxymorphone                                         | 0.0190 | 0.0176 | 0.0204 |
| Dextromethorphan                                    | 0.0188 | 0.0176 | 0.0202 |
| Rituximab                                           | 0.0188 | 0.0175 | 0.0201 |
| Hydrocodone chlorpheniramine                        | 0.0185 | 0.0171 | 0.0197 |
| Tegaserod                                           | 0.0182 | 0.0170 | 0.0196 |
| Cocaine                                             | 0.0181 | 0.0167 | 0.0194 |
| Dialysis Solution                                   | 0.0180 | 0.0170 | 0.0190 |
| Edrophonium atropine                                | 0.0179 | 0.0166 | 0.0192 |
| Meperidine promethazine                             | 0.0179 | 0.0167 | 0.0193 |
| Pseudoephedrine carbinoxamine                       | 0.0179 | 0.0167 | 0.0192 |
| Tolterodine                                         | 0.0179 | 0.0166 | 0.0192 |
| Corticotropin                                       | 0.0178 | 0.0165 | 0.0190 |
| Diltiazem                                           | 0.0176 | 0.0164 | 0.0189 |
| Fluvoxamine                                         | 0.0176 | 0.0163 | 0.0189 |
| Opium                                               | 0.0176 | 0.0163 | 0.0191 |
| Cholestyramine                                      | 0.0175 | 0.0162 | 0.0188 |
| Lidocaine epinephrine tetracaine                    | 0.0172 | 0.0160 | 0.0185 |
| Cefixime                                            | 0.0168 | 0.0155 | 0.0183 |
| Diatrizoate sodium                                  | 0.0164 | 0.0150 | 0.0179 |
| Nitazoxanide                                        | 0.0163 | 0.0152 | 0.0175 |
| Carvedilol                                          | 0.0160 | 0.0148 | 0.0174 |
| Belladonna opium                                    | 0.0159 | 0.0146 | 0.0171 |
| Itraconazole                                        | 0.0158 | 0.0145 | 0.0170 |
| Sevelamer                                           | 0.0158 | 0.0147 | 0.0170 |
| Ferric subsulfate solution                          | 0.0157 | 0.0143 | 0.0172 |
| Guaifenesin pseudoephedrine                         | 0.0156 | 0.0144 | 0.0168 |
| Prazosin                                            | 0.0155 | 0.0143 | 0.0168 |
| Pseudoephedrine brompheniramine<br>dextromethorphan | 0.0152 | 0.0140 | 0.0165 |
| Tetracycline                                        | 0.0152 | 0.0140 | 0.0164 |
| Undecylenic acid                                    | 0.0152 | 0.0135 | 0.0171 |
| Pyridostigmine                                      | 0.0146 | 0.0135 | 0.0158 |
| Aluminum acetate                                    | 0.0145 | 0.0134 | 0.0157 |
| Citrate phosphate dextr                             | 0.0144 | 0.0132 | 0.0156 |
| Desflurane                                          | 0.0143 | 0.0131 | 0.0155 |
| Mitoxantrone                                        | 0.0143 | 0.0132 | 0.0156 |
| Acetaminophen caffeine butalbital                   | 0.0141 | 0.0130 | 0.0154 |
| Dalteparin                                          | 0.0141 | 0.0130 | 0.0152 |
| Formoterol fumarate                                 | 0.0141 | 0.0130 | 0.0153 |
| Tamsulosin                                          | 0.0141 | 0.0130 | 0.0151 |
| Gadodiamide                                         | 0.0139 | 0.0128 | 0.0151 |
| Dantrolene                                          | 0.0138 | 0.0126 | 0.0150 |
| Guaifenesin                                         | 0.0138 | 0.0126 | 0.0150 |
| Methoxyflurane                                      | 0.0137 | 0.0125 | 0.0150 |
| Amantadine                                          | 0.0135 | 0.0124 | 0.0147 |
| Atovaquone                                          | 0.0135 | 0.0124 | 0.0146 |
| Indigotindisulfonate                                | 0.0135 | 0.0124 | 0.0146 |
| Vaccine: meningococcal                              | 0.0135 | 0.0124 | 0.0146 |
| Loratadine pseudoephedrine                          | 0.0131 | 0.0121 | 0.0142 |



|                                                                    |        |        |        |
|--------------------------------------------------------------------|--------|--------|--------|
| Leuprolide depot                                                   | 0.0130 | 0.0118 | 0.0141 |
| Retepase                                                           | 0.0130 | 0.0120 | 0.0140 |
| Factor viii                                                        | 0.0129 | 0.0118 | 0.0142 |
| Rasburicase                                                        | 0.0129 | 0.0119 | 0.0140 |
| Pregabalin                                                         | 0.0128 | 0.0117 | 0.0138 |
| Hydrocortisone sodium phosphate                                    | 0.0126 | 0.0115 | 0.0137 |
| Pramipexole                                                        | 0.0126 | 0.0115 | 0.0136 |
| Nortriptyline                                                      | 0.0124 | 0.0115 | 0.0136 |
| Dimenhydrinate                                                     | 0.0123 | 0.0112 | 0.0134 |
| Propoxyphene                                                       | 0.0121 | 0.0110 | 0.0132 |
| Desloratadine                                                      | 0.0119 | 0.0108 | 0.0130 |
| Fluorouracil                                                       | 0.0119 | 0.0109 | 0.0130 |
| Iodine                                                             | 0.0118 | 0.0106 | 0.0130 |
| Methyldopa                                                         | 0.0118 | 0.0107 | 0.0130 |
| Fluorescein                                                        | 0.0117 | 0.0107 | 0.0129 |
| Hydrocodone guaifenesin                                            | 0.0117 | 0.0107 | 0.0128 |
| Sodium thiosulfate                                                 | 0.0115 | 0.0104 | 0.0125 |
| Antithymocyte globulin                                             | 0.0114 | 0.0105 | 0.0125 |
| Brompheniramine                                                    | 0.0114 | 0.0104 | 0.0125 |
| Gadodiamide caldiameter                                            | 0.0113 | 0.0103 | 0.0122 |
| Sotalol                                                            | 0.0111 | 0.0102 | 0.0121 |
| Dexrazoxane                                                        | 0.0110 | 0.0100 | 0.0120 |
| Lomustine                                                          | 0.0110 | 0.0100 | 0.0120 |
| Orphenadrine                                                       | 0.0110 | 0.0100 | 0.0119 |
| Melatonin                                                          | 0.0109 | 0.0099 | 0.0119 |
| L hyoscyamine sulfate                                              | 0.0106 | 0.0095 | 0.0116 |
| Pamidronate                                                        | 0.0106 | 0.0096 | 0.0116 |
| Atorvastatin                                                       | 0.0105 | 0.0095 | 0.0116 |
| Fluocinonide                                                       | 0.0105 | 0.0094 | 0.0114 |
| Vaccine: hepatitis a                                               | 0.0105 | 0.0089 | 0.0120 |
| Somatropin                                                         | 0.0102 | 0.0092 | 0.0112 |
| Acetaminophen chlorpheniramine<br>dextromethorphan pseudoephedrine | 0.0101 | 0.0091 | 0.0111 |
| Cefamandole                                                        | 0.0099 | 0.0089 | 0.0109 |
| Sulfasalazine                                                      | 0.0098 | 0.0088 | 0.0108 |
| Glyburide                                                          | 0.0097 | 0.0088 | 0.0107 |
| Liothyronine                                                       | 0.0097 | 0.0086 | 0.0106 |
| Vaccine: varicella                                                 | 0.0097 | 0.0087 | 0.0106 |
| Busulfan                                                           | 0.0096 | 0.0089 | 0.0104 |
| Collagenase                                                        | 0.0096 | 0.0087 | 0.0106 |
| Daclizumab                                                         | 0.0096 | 0.0088 | 0.0104 |
| Albuterol ipratropium                                              | 0.0094 | 0.0084 | 0.0104 |
| Cefadroxil                                                         | 0.0094 | 0.0086 | 0.0103 |
| Glutamic acid hcl                                                  | 0.0094 | 0.0085 | 0.0103 |
| Hyaluronate                                                        | 0.0093 | 0.0084 | 0.0102 |
| Imipenem cilastatin                                                | 0.0092 | 0.0083 | 0.0102 |
| Lamivudine                                                         | 0.0092 | 0.0082 | 0.0102 |
| Minoxidil                                                          | 0.0092 | 0.0083 | 0.0102 |
| Vaccine: diptheria, tetanus,<br>haemophilus b                      | 0.0092 | 0.0082 | 0.0102 |
| Dipyridamole                                                       | 0.0090 | 0.0080 | 0.0101 |
| Fluoride                                                           | 0.0090 | 0.0081 | 0.0098 |
| Carbamide                                                          | 0.0089 | 0.0079 | 0.0100 |
| Mitomycin                                                          | 0.0089 | 0.0081 | 0.0098 |

|                                  |        |        |        |
|----------------------------------|--------|--------|--------|
| Azelastine                       | 0.0088 | 0.0079 | 0.0098 |
| Mafenide                         | 0.0088 | 0.0081 | 0.0097 |
| Deferoxamine                     | 0.0087 | 0.0078 | 0.0096 |
| Ethambutol                       | 0.0086 | 0.0077 | 0.0095 |
| Diazoxide                        | 0.0085 | 0.0074 | 0.0096 |
| Drotrecogin alfa                 | 0.0084 | 0.0075 | 0.0094 |
| Clopidogrel                      | 0.0083 | 0.0074 | 0.0093 |
| Doxapram                         | 0.0082 | 0.0073 | 0.0090 |
| Flecainide                       | 0.0082 | 0.0074 | 0.0091 |
| Pyrazinamide                     | 0.0082 | 0.0073 | 0.0091 |
| Salmeterol                       | 0.0081 | 0.0073 | 0.0091 |
| Meclizine                        | 0.0080 | 0.0072 | 0.0089 |
| Polycarbophil                    | 0.0080 | 0.0071 | 0.0089 |
| Nalmefene                        | 0.0079 | 0.0069 | 0.0089 |
| Temozolomide                     | 0.0079 | 0.0070 | 0.0088 |
| Argatroban                       | 0.0078 | 0.0069 | 0.0088 |
| Charcoal                         | 0.0078 | 0.0070 | 0.0087 |
| Immune globulin varicella zoster | 0.0078 | 0.0069 | 0.0086 |
| Fludarabine                      | 0.0076 | 0.0067 | 0.0084 |
| Trihexyphenidyl                  | 0.0076 | 0.0067 | 0.0085 |
| Darbepoetin alfa                 | 0.0074 | 0.0065 | 0.0083 |
| Lopinavir ritonavir              | 0.0074 | 0.0067 | 0.0081 |
| Urokinase                        | 0.0074 | 0.0066 | 0.0083 |
| Botulinum toxin type a           | 0.0073 | 0.0065 | 0.0082 |
| Lindane                          | 0.0073 | 0.0066 | 0.0082 |
| Tiagabine                        | 0.0073 | 0.0065 | 0.0081 |
| Topotecan hcl                    | 0.0070 | 0.0061 | 0.0078 |
| Homatropine                      | 0.0069 | 0.0061 | 0.0076 |
| Micafungin                       | 0.0069 | 0.0060 | 0.0077 |
| Aluminum                         | 0.0068 | 0.0060 | 0.0077 |
| Bromocriptine                    | 0.0067 | 0.0058 | 0.0075 |
| Losartan                         | 0.0066 | 0.0057 | 0.0075 |
| Potassium iodide                 | 0.0066 | 0.0058 | 0.0074 |
| Ethosuximide                     | 0.0065 | 0.0057 | 0.0074 |
| Melphalan                        | 0.0064 | 0.0057 | 0.0070 |
| Olopatadine                      | 0.0064 | 0.0056 | 0.0071 |
| Fluocinolone                     | 0.0062 | 0.0055 | 0.0070 |
| Primidone                        | 0.0062 | 0.0055 | 0.0070 |
| Immune globulin cmv              | 0.0061 | 0.0053 | 0.0069 |
| Tranexamic acid                  | 0.0061 | 0.0053 | 0.0070 |
| Colistimethate                   | 0.0060 | 0.0052 | 0.0068 |
| Sargramostim                     | 0.0060 | 0.0052 | 0.0068 |
| Trifluridine                     | 0.0060 | 0.0050 | 0.0069 |
| Doxazosin                        | 0.0058 | 0.0049 | 0.0067 |
| Methohexital                     | 0.0058 | 0.0050 | 0.0065 |
| Procainamide                     | 0.0057 | 0.0050 | 0.0066 |
| Dorzolamide                      | 0.0055 | 0.0048 | 0.0063 |
| Latanoprost                      | 0.0055 | 0.0047 | 0.0062 |
| Perphenazine                     | 0.0055 | 0.0048 | 0.0063 |
| Valsartan                        | 0.0055 | 0.0048 | 0.0062 |
| Nadolol                          | 0.0053 | 0.0047 | 0.0061 |
| Basiliximab                      | 0.0052 | 0.0047 | 0.0058 |
| Nesiritide                       | 0.0052 | 0.0045 | 0.0058 |
| Factor ix                        | 0.0050 | 0.0044 | 0.0057 |
| Epoprostenol                     | 0.0049 | 0.0043 | 0.0056 |

|                                       |        |        |        |
|---------------------------------------|--------|--------|--------|
| Fenoldopam                            | 0.0049 | 0.0042 | 0.0056 |
| Gemtuzumab ozogamicin                 | 0.0049 | 0.0042 | 0.0056 |
| Vitamin b2                            | 0.0049 | 0.0041 | 0.0056 |
| Carbidopa levodopa                    | 0.0048 | 0.0041 | 0.0055 |
| Cladribine                            | 0.0048 | 0.0041 | 0.0055 |
| Dicloxacillin                         | 0.0048 | 0.0041 | 0.0056 |
| Griseofulvin                          | 0.0048 | 0.0041 | 0.0056 |
| Zalepon                               | 0.0048 | 0.0042 | 0.0055 |
| Dorzolamide timolol                   | 0.0046 | 0.0040 | 0.0053 |
| Doxepin                               | 0.0046 | 0.0039 | 0.0052 |
| Lymphocyte immune globulin            | 0.0046 | 0.0039 | 0.0053 |
| Alemtuzumab                           | 0.0044 | 0.0038 | 0.0051 |
| Alendronate                           | 0.0044 | 0.0038 | 0.0051 |
| Clomipramine                          | 0.0043 | 0.0037 | 0.0049 |
| ioxaglate meglumine, ioxaglate sodium | 0.0043 | 0.0036 | 0.0050 |
| Nevirapine                            | 0.0040 | 0.0030 | 0.0052 |
| Methimazole                           | 0.0039 | 0.0033 | 0.0045 |
| Ritonavir                             | 0.0038 | 0.0033 | 0.0043 |
| Rosiglitazone                         | 0.0038 | 0.0032 | 0.0045 |
| Zanamivir                             | 0.0037 | 0.0030 | 0.0043 |
| Imatinib mesylate                     | 0.0036 | 0.0030 | 0.0042 |
| Fludeoxyglucose                       | 0.0035 | 0.0029 | 0.0041 |
| Human antithrombin iii                | 0.0034 | 0.0027 | 0.0040 |
| Gadoteridol                           | 0.0034 | 0.0028 | 0.0040 |
| Balsalazide                           | 0.0033 | 0.0027 | 0.0039 |
| Probenecid                            | 0.0032 | 0.0026 | 0.0038 |
| Leuprolide                            | 0.0031 | 0.0025 | 0.0036 |
| Cidofovir                             | 0.0030 | 0.0025 | 0.0036 |
| Potassium phosphate sodium phosphate  | 0.0030 | 0.0024 | 0.0036 |
| Sodium sulfacetamide                  | 0.0030 | 0.0025 | 0.0036 |
| Stavudine                             | 0.0030 | 0.0025 | 0.0035 |
| Amiloride                             | 0.0029 | 0.0024 | 0.0035 |
| Estradiol                             | 0.0029 | 0.0024 | 0.0034 |
| Pravastatin                           | 0.0029 | 0.0024 | 0.0035 |
| Cisapride                             | 0.0028 | 0.0023 | 0.0034 |
| Palonosetron hcl                      | 0.0028 | 0.0022 | 0.0033 |
| Chromium                              | 0.0027 | 0.0022 | 0.0033 |
| Edetate calcium disodium              | 0.0027 | 0.0022 | 0.0033 |
| Thiotepa                              | 0.0027 | 0.0022 | 0.0032 |
| Vaccine: rabies                       | 0.0027 | 0.0021 | 0.0033 |
| Ribavirin                             | 0.0024 | 0.0020 | 0.0029 |
| Flucytosine                           | 0.0023 | 0.0018 | 0.0028 |
| Tretinoin                             | 0.0023 | 0.0018 | 0.0028 |
| Trimethoprim                          | 0.0023 | 0.0019 | 0.0029 |
| Foscarnet                             | 0.0022 | 0.0017 | 0.0027 |
| Idarubicin                            | 0.0020 | 0.0016 | 0.0024 |
| Iodine 131                            | 0.0020 | 0.0015 | 0.0024 |
| Timolol                               | 0.0020 | 0.0016 | 0.0025 |
| Halothane                             | 0.0019 | 0.0014 | 0.0024 |
| Mexiletine                            | 0.0019 | 0.0014 | 0.0023 |
| Procarbazine                          | 0.0019 | 0.0015 | 0.0023 |
| Bosentan                              | 0.0018 | 0.0013 | 0.0023 |
| Formaldehyde                          | 0.0018 | 0.0013 | 0.0023 |
| Promazine                             | 0.0018 | 0.0014 | 0.0022 |
| Succimer                              | 0.0016 | 0.0013 | 0.0020 |

|                          |        |        |        |
|--------------------------|--------|--------|--------|
| Interferon gamma 1b      | 0.0013 | 0.0010 | 0.0017 |
| Sodium phenylbutyrate    | 0.0013 | 0.0010 | 0.0017 |
| Sodium benzoate          | 0.0012 | 0.0009 | 0.0015 |
| Testosterone             | 0.0012 | 0.0009 | 0.0016 |
| Norethindrone            | 0.0011 | 0.0008 | 0.0014 |
| Dextroamphetamin sulfate | 0.0010 | 0.0007 | 0.0014 |
|                          |        |        |        |

Table B: Estimated Percentage of Patients Exposed to the 700 Most Commonly Used Medications, Sorted Alphabetically

| Drug                                                            | Estimate | 95% CI LL | 95% CI UL |
|-----------------------------------------------------------------|----------|-----------|-----------|
| Acetaminophen                                                   | 17.3647  | 17.3165   | 17.4138   |
| Acetaminophen caffeine butalbital                               | 0.0141   | 0.0130    | 0.0154    |
| Acetaminophen chlorpheniramine dextromethorphan pseudoephedrine | 0.0101   | 0.0091    | 0.0111    |
| Acetaminophen codeine                                           | 2.2798   | 2.2662    | 2.2927    |
| Acetazolamide                                                   | 0.1437   | 0.1403    | 0.1475    |
| Acetylcysteine                                                  | 0.2376   | 0.2328    | 0.2426    |
| Acyclovir                                                       | 0.6514   | 0.6431    | 0.6597    |
| Adenosine                                                       | 0.1002   | 0.0972    | 0.1037    |
| Albumin                                                         | 1.0432   | 1.0355    | 1.0514    |
| Albuterol                                                       | 6.4663   | 6.4473    | 6.4833    |
| Albuterol ipratropium                                           | 0.0094   | 0.0084    | 0.0104    |
| Alemtuzumab                                                     | 0.0044   | 0.0038    | 0.0051    |
| Alendronate                                                     | 0.0044   | 0.0038    | 0.0051    |
| Alfentanil                                                      | 0.0252   | 0.0237    | 0.0268    |
| Allopurinol                                                     | 0.0827   | 0.0804    | 0.0848    |
| Alprazolam                                                      | 0.0476   | 0.0455    | 0.0496    |
| Alprostadil                                                     | 0.1436   | 0.1405    | 0.1470    |
| Alteplase                                                       | 0.3818   | 0.3765    | 0.3870    |
| Aluminum                                                        | 0.0068   | 0.0060    | 0.0077    |
| Aluminum acetate                                                | 0.0145   | 0.0134    | 0.0157    |
| Aluminum magnesium hydroxide                                    | 0.6240   | 0.6144    | 0.6343    |
| Amantadine                                                      | 0.0135   | 0.0124    | 0.0147    |
| Amikacin                                                        | 0.0988   | 0.0955    | 0.1019    |
| Amiloride                                                       | 0.0029   | 0.0024    | 0.0035    |
| Aminocaproic acid                                               | 0.0738   | 0.0715    | 0.0760    |
| Aminophylline                                                   | 0.1536   | 0.1497    | 0.1574    |
| Amiodarone                                                      | 0.0517   | 0.0495    | 0.0539    |
| Amitriptyline                                                   | 0.0803   | 0.0776    | 0.0830    |
| Amlodipine                                                      | 0.1750   | 0.1712    | 0.1789    |
| Ammonium chloride                                               | 0.0426   | 0.0405    | 0.0445    |
| Amoxicillin                                                     | 0.9451   | 0.9357    | 0.9549    |
| Amoxicillin clavulanate                                         | 0.7150   | 0.7066    | 0.7230    |
| Amphetamine complex                                             | 0.0221   | 0.0206    | 0.0237    |
| Amphotericin b                                                  | 0.1577   | 0.1539    | 0.1615    |
| Ampicillin                                                      | 8.9962   | 8.9632    | 9.0285    |
| Ampicillin sulbactam                                            | 0.9867   | 0.9763    | 0.9967    |
| Antithymocyte globulin                                          | 0.0114   | 0.0105    | 0.0125    |
| Aprepitant                                                      | 0.0222   | 0.0208    | 0.0237    |
| Aprotinin                                                       | 0.1555   | 0.1527    | 0.1583    |
| Argatroban                                                      | 0.0078   | 0.0069    | 0.0088    |
| Arginine                                                        | 0.0208   | 0.0194    | 0.0221    |
| Aripiprazole                                                    | 0.3525   | 0.3474    | 0.3575    |
| Asparaginase                                                    | 0.0340   | 0.0323    | 0.0360    |
| Aspirin                                                         | 0.4641   | 0.4583    | 0.4702    |
| Aspirin codeine                                                 | 0.0193   | 0.0164    | 0.0223    |
| Atenolol                                                        | 0.0740   | 0.0715    | 0.0765    |
| Atomoxetine                                                     | 0.1259   | 0.1223    | 0.1291    |
| Atorvastatin                                                    | 0.0105   | 0.0095    | 0.0116    |
| Atovaquone                                                      | 0.0135   | 0.0124    | 0.0146    |
| Atracurium                                                      | 0.2565   | 0.2520    | 0.2607    |
| Atropine                                                        | 1.2013   | 1.1923    | 1.2104    |
| Azathioprine                                                    | 0.0498   | 0.0478    | 0.0519    |

|                          |        |        |        |
|--------------------------|--------|--------|--------|
| Azelastine               | 0.0088 | 0.0079 | 0.0098 |
| Azithromycin             | 2.2722 | 2.2584 | 2.2849 |
| Aztreonam                | 0.0370 | 0.0352 | 0.0389 |
| Bacitracin               | 2.4278 | 2.4075 | 2.4478 |
| Baclofen                 | 0.1983 | 0.1940 | 0.2026 |
| Balsalazide              | 0.0033 | 0.0027 | 0.0039 |
| Barium sulfate           | 0.0807 | 0.0777 | 0.0836 |
| Basiliximab              | 0.0052 | 0.0047 | 0.0058 |
| Beclomethasone           | 0.0731 | 0.0705 | 0.0759 |
| Belladonna opium         | 0.0159 | 0.0146 | 0.0171 |
| Benzocaine               | 0.8149 | 0.8071 | 0.8228 |
| Benzoin tincture         | 0.1183 | 0.1150 | 0.1219 |
| Benzonatate              | 0.0230 | 0.0215 | 0.0245 |
| Benztropine              | 0.1761 | 0.1712 | 0.1807 |
| Beractant                | 0.4884 | 0.4818 | 0.4950 |
| Betamethasone            | 0.1348 | 0.1316 | 0.1377 |
| Bethanechol              | 0.0237 | 0.0223 | 0.0254 |
| Bisacodyl                | 0.7536 | 0.7459 | 0.7628 |
| Bleomycin                | 0.0285 | 0.0268 | 0.0301 |
| Bosentan                 | 0.0018 | 0.0013 | 0.0023 |
| Botulinum toxin type a   | 0.0073 | 0.0065 | 0.0082 |
| Bromocriptine            | 0.0067 | 0.0058 | 0.0075 |
| Brompheniramine          | 0.0114 | 0.0104 | 0.0125 |
| Budesonide               | 1.7875 | 1.7753 | 1.7991 |
| Bumetanide               | 0.0631 | 0.0606 | 0.0654 |
| Bupivacaine              | 2.1625 | 2.1496 | 2.1760 |
| Bupivacaine epinephrine  | 1.3571 | 1.3465 | 1.3673 |
| Bupropion                | 0.1636 | 0.1598 | 0.1672 |
| Buspirone                | 0.0304 | 0.0287 | 0.0319 |
| Busulfan                 | 0.0096 | 0.0089 | 0.0104 |
| Butorphanol              | 0.7702 | 0.7630 | 0.7776 |
| Caffeine                 | 0.9054 | 0.8984 | 0.9122 |
| Caffeine sodium benzoate | 0.0207 | 0.0195 | 0.0220 |
| Calamine pramoxine       | 0.0671 | 0.0636 | 0.0708 |
| Calcium acetate          | 0.0314 | 0.0296 | 0.0332 |
| Calcium carbonate        | 0.2691 | 0.2631 | 0.2741 |
| Calcium chloride         | 0.5885 | 0.5825 | 0.5941 |
| Calcium gluconate        | 2.6932 | 2.6770 | 2.7094 |
| Calfactant               | 0.2626 | 0.2579 | 0.2675 |
| Captopril                | 0.1575 | 0.1541 | 0.1610 |
| Carbamazepine            | 0.2077 | 0.2034 | 0.2124 |
| Carbamide                | 0.0089 | 0.0079 | 0.0100 |
| Carbamide peroxide otic  | 0.0223 | 0.0207 | 0.0240 |
| Carbidopa levodopa       | 0.0048 | 0.0041 | 0.0055 |
| Carboplatin              | 0.0393 | 0.0373 | 0.0413 |
| Carboprost tromethamine  | 0.0467 | 0.0445 | 0.0488 |
| Carvedilol               | 0.0160 | 0.0148 | 0.0174 |
| Caspofungin              | 0.0372 | 0.0354 | 0.0391 |
| Cefaclor                 | 0.0500 | 0.0469 | 0.0533 |
| Cefadroxil               | 0.0094 | 0.0086 | 0.0103 |
| Cefamandole              | 0.0099 | 0.0089 | 0.0109 |
| Cefazolin                | 4.2439 | 4.2298 | 4.2581 |
| Cefdinir                 | 0.2670 | 0.2620 | 0.2727 |
| Cefepime                 | 0.5625 | 0.5563 | 0.5697 |
| Cefixime                 | 0.0168 | 0.0155 | 0.0183 |

|                              |        |        |        |
|------------------------------|--------|--------|--------|
| Cefotaxime                   | 2.6960 | 2.6794 | 2.7125 |
| Cefotetan                    | 0.1673 | 0.1633 | 0.1715 |
| Cefoxitin                    | 0.6913 | 0.6848 | 0.6985 |
| Cefpodoxime                  | 0.0273 | 0.0257 | 0.0290 |
| Cefprozil                    | 0.0742 | 0.0714 | 0.0768 |
| Ceftazidime                  | 0.5675 | 0.5605 | 0.5744 |
| Ceftizoxime                  | 0.0269 | 0.0253 | 0.0285 |
| Ceftriaxone                  | 7.2806 | 7.2601 | 7.3014 |
| Cefuroxime                   | 0.8088 | 0.8004 | 0.8175 |
| Celecoxib                    | 0.0316 | 0.0300 | 0.0333 |
| Cephalexin                   | 0.3699 | 0.3641 | 0.3759 |
| Cephradine                   | 0.0199 | 0.0188 | 0.0210 |
| Cetirizine                   | 0.3999 | 0.3943 | 0.4061 |
| Charcoal                     | 0.0078 | 0.0070 | 0.0087 |
| Chloral                      | 0.7309 | 0.7232 | 0.7388 |
| Chlorhexidine                | 0.4213 | 0.4157 | 0.4275 |
| Chloroethane                 | 0.0786 | 0.0759 | 0.0816 |
| Chloroprocaine               | 0.0803 | 0.0746 | 0.0856 |
| Chlorothiazide               | 0.2573 | 0.2529 | 0.2618 |
| Chlorpromazine               | 0.0905 | 0.0875 | 0.0935 |
| Cholestyramine               | 0.0175 | 0.0162 | 0.0188 |
| Cholestyramine light         | 0.0995 | 0.0964 | 0.1028 |
| Chromium                     | 0.0027 | 0.0022 | 0.0033 |
| Cidofovir                    | 0.0030 | 0.0025 | 0.0036 |
| Cimetidine                   | 0.0637 | 0.0611 | 0.0664 |
| Ciprofloxacin                | 0.3883 | 0.3824 | 0.3949 |
| Ciprofloxacin dexameth otic  | 0.0468 | 0.0449 | 0.0490 |
| Ciprofloxacin hc otic        | 0.0258 | 0.0243 | 0.0275 |
| Cisapride                    | 0.0028 | 0.0023 | 0.0034 |
| Cisatracurium                | 0.3019 | 0.2962 | 0.3071 |
| Cisplatin                    | 0.0879 | 0.0853 | 0.0905 |
| Citalopram                   | 0.0831 | 0.0803 | 0.0860 |
| Citrate phosphate dextr      | 0.0144 | 0.0132 | 0.0156 |
| Cladribine                   | 0.0048 | 0.0041 | 0.0055 |
| Clarithromycin               | 0.1082 | 0.1049 | 0.1115 |
| Clindamycin                  | 2.4258 | 2.4135 | 2.4392 |
| Clomipramine                 | 0.0043 | 0.0037 | 0.0049 |
| Clonazepam                   | 0.2531 | 0.2486 | 0.2577 |
| Clonidine                    | 0.4157 | 0.4098 | 0.4216 |
| Clopidogrel                  | 0.0083 | 0.0074 | 0.0093 |
| Clorazepate                  | 0.0281 | 0.0265 | 0.0298 |
| Clotrimazole                 | 0.2030 | 0.1987 | 0.2076 |
| Cocaine                      | 0.0181 | 0.0167 | 0.0194 |
| Codeine                      | 0.1039 | 0.1005 | 0.1072 |
| Colistimethate               | 0.0060 | 0.0052 | 0.0068 |
| Collagenase                  | 0.0096 | 0.0087 | 0.0106 |
| Corticotropin                | 0.0178 | 0.0165 | 0.0190 |
| Cosyntropin                  | 0.0463 | 0.0442 | 0.0486 |
| Cromolyn                     | 0.0277 | 0.0259 | 0.0293 |
| Cyclobenzaprine              | 0.0716 | 0.0692 | 0.0742 |
| Cyclopentolate               | 0.1498 | 0.1462 | 0.1538 |
| Cyclopentolate phenylephrine | 0.6055 | 0.5991 | 0.6118 |
| Cyclophosphamide             | 0.2462 | 0.2425 | 0.2500 |
| Cyclosporine                 | 0.0748 | 0.0724 | 0.0773 |
| Cyproheptadine               | 0.0860 | 0.0831 | 0.0888 |

|                                              |        |        |        |
|----------------------------------------------|--------|--------|--------|
| Cytarabine                                   | 0.1868 | 0.1828 | 0.1903 |
| Daclizumab                                   | 0.0096 | 0.0088 | 0.0104 |
| Dactinomycin                                 | 0.0367 | 0.0350 | 0.0383 |
| Dalteparin                                   | 0.0141 | 0.0130 | 0.0152 |
| Dantrolene                                   | 0.0138 | 0.0126 | 0.0150 |
| Dapsone                                      | 0.0523 | 0.0501 | 0.0545 |
| Darbepoetin albumin                          | 0.0803 | 0.0777 | 0.0831 |
| Darbepoetin alfa                             | 0.0074 | 0.0065 | 0.0083 |
| Daunorubicin                                 | 0.0450 | 0.0431 | 0.0469 |
| Deferoxamine                                 | 0.0087 | 0.0078 | 0.0096 |
| Desflurane                                   | 0.0143 | 0.0131 | 0.0155 |
| Desloratadine                                | 0.0119 | 0.0108 | 0.0130 |
| Desmopressin                                 | 0.1451 | 0.1414 | 0.1488 |
| Dexamethasone                                | 3.0949 | 3.0809 | 3.1102 |
| Dexamethasone neomycin                       | 0.0345 | 0.0327 | 0.0362 |
| Dexmedetomidine                              | 0.1123 | 0.1093 | 0.1151 |
| Dexmethylphenidate                           | 0.0324 | 0.0307 | 0.0340 |
| Dexrazoxane                                  | 0.0110 | 0.0100 | 0.0120 |
| Dextran                                      | 0.0300 | 0.0283 | 0.0319 |
| Dextroamphet                                 | 0.0401 | 0.0382 | 0.0418 |
| Dextroamphetamin sulfate                     | 0.0010 | 0.0007 | 0.0014 |
| Dextroamphetamine amphetamine                | 0.1841 | 0.1803 | 0.1880 |
| Dextromethorphan                             | 0.0188 | 0.0176 | 0.0202 |
| Dialysis Solution                            | 0.0180 | 0.0170 | 0.0190 |
| Diatrizoate                                  | 0.0705 | 0.0679 | 0.0731 |
| Diatrizoate meglumine and diatrizoate sodium | 0.2578 | 0.2533 | 0.2624 |
| Diatrizoate sodium                           | 0.0164 | 0.0150 | 0.0179 |
| Diazepam                                     | 0.6160 | 0.6086 | 0.6231 |
| Diazoxide                                    | 0.0085 | 0.0074 | 0.0096 |
| Dibucaine                                    | 0.0791 | 0.0756 | 0.0823 |
| Dicloxacillin                                | 0.0048 | 0.0041 | 0.0056 |
| Dicyclomine                                  | 0.0440 | 0.0419 | 0.0462 |
| Digoxin                                      | 0.3024 | 0.2976 | 0.3075 |
| Dihydroergotamine                            | 0.0311 | 0.0297 | 0.0326 |
| Diltiazem                                    | 0.0176 | 0.0164 | 0.0189 |
| Dimenhydrinate                               | 0.0123 | 0.0112 | 0.0134 |
| Dinoprostone                                 | 0.2008 | 0.1964 | 0.2047 |
| Diphenhydramine                              | 3.5479 | 3.5310 | 3.5636 |
| Diphenoxylate atropine                       | 0.0336 | 0.0318 | 0.0353 |
| Dipyridamole                                 | 0.0090 | 0.0080 | 0.0101 |
| Divalproex sodium                            | 0.4258 | 0.4204 | 0.4316 |
| Dobutamine                                   | 0.2408 | 0.2365 | 0.2451 |
| Docusate                                     | 2.0829 | 2.0714 | 2.0954 |
| Docusate sodium casanthranol*                | 0.0519 | 0.0499 | 0.0543 |
| Dolasetron                                   | 0.8004 | 0.7927 | 0.8084 |
| Donnatal                                     | 0.0260 | 0.0245 | 0.0276 |
| Dopamine                                     | 0.9528 | 0.9459 | 0.9602 |
| Dornase                                      | 0.2793 | 0.2751 | 0.2833 |
| Dorzolamide                                  | 0.0055 | 0.0048 | 0.0063 |
| Dorzolamide timolol                          | 0.0046 | 0.0040 | 0.0053 |
| Doxapram                                     | 0.0082 | 0.0073 | 0.0090 |
| Doxazosin                                    | 0.0058 | 0.0049 | 0.0067 |
| Doxepin                                      | 0.0046 | 0.0039 | 0.0052 |
| Doxorubicin                                  | 0.1437 | 0.1405 | 0.1470 |
| Doxycycline                                  | 0.1583 | 0.1546 | 0.1620 |



|                            |        |        |        |
|----------------------------|--------|--------|--------|
| Dronabinol                 | 0.0294 | 0.0277 | 0.0310 |
| Droperidol                 | 0.0910 | 0.0879 | 0.0937 |
| Drotrecogin alfa           | 0.0084 | 0.0075 | 0.0094 |
| Duloxetine                 | 0.0526 | 0.0503 | 0.0548 |
| Edetate calcium disodium   | 0.0027 | 0.0022 | 0.0033 |
| Edrophonium                | 0.1032 | 0.1003 | 0.1065 |
| Edrophonium atropine       | 0.0179 | 0.0166 | 0.0192 |
| Enalapril                  | 0.2720 | 0.2674 | 0.2772 |
| Enoxaparin                 | 0.2993 | 0.2944 | 0.3044 |
| Ephedrine                  | 0.4288 | 0.4225 | 0.4347 |
| Epinephrine                | 1.8896 | 1.8769 | 1.9019 |
| Epoetin                    | 0.3670 | 0.3616 | 0.3725 |
| Epoprostenol               | 0.0049 | 0.0043 | 0.0056 |
| Ertapenem                  | 0.0800 | 0.0774 | 0.0827 |
| Erythromycin sulfisoxazole | 0.0222 | 0.0207 | 0.0236 |
| Escitalopram oxalate       | 0.3452 | 0.3396 | 0.3506 |
| Esmolol                    | 0.0811 | 0.0783 | 0.0836 |
| Esomeprazole               | 0.1757 | 0.1716 | 0.1795 |
| Estradiol                  | 0.0029 | 0.0024 | 0.0034 |
| Estrogen conjugated        | 0.0209 | 0.0195 | 0.0224 |
| Ethacrynic acid            | 0.0223 | 0.0208 | 0.0237 |
| Ethambutol                 | 0.0086 | 0.0077 | 0.0095 |
| Ethosuximide               | 0.0065 | 0.0057 | 0.0074 |
| Etomidate                  | 0.1785 | 0.1746 | 0.1824 |
| Etoposide                  | 0.1964 | 0.1927 | 0.2000 |
| Factor ix                  | 0.0050 | 0.0044 | 0.0057 |
| Factor viia                | 0.0399 | 0.0381 | 0.0419 |
| Factor viii                | 0.0129 | 0.0118 | 0.0142 |
| Famotidine                 | 1.9043 | 1.8932 | 1.9164 |
| Felbamate                  | 0.0219 | 0.0205 | 0.0235 |
| Fenoldopam                 | 0.0049 | 0.0042 | 0.0056 |
| Fentanyl                   | 7.8643 | 7.8463 | 7.8825 |
| Fentanyl bupivacaine       | 0.3988 | 0.3919 | 0.4054 |
| Ferric subsulfate solution | 0.0157 | 0.0143 | 0.0172 |
| Ferrous sulfate            | 0.2376 | 0.2323 | 0.2423 |
| Fexofenadine               | 0.0603 | 0.0579 | 0.0626 |
| Filgrastim                 | 0.2961 | 0.2912 | 0.3004 |
| Flecainide                 | 0.0082 | 0.0074 | 0.0091 |
| Fluconazole                | 0.6871 | 0.6797 | 0.6943 |
| Flucytosine                | 0.0023 | 0.0018 | 0.0028 |
| Fludarabine                | 0.0076 | 0.0067 | 0.0084 |
| Fludeoxyglucose            | 0.0035 | 0.0029 | 0.0041 |
| Fludrocortisone            | 0.0388 | 0.0369 | 0.0407 |
| Flumazenil                 | 0.0795 | 0.0766 | 0.0822 |
| Flunisolide                | 0.0713 | 0.0688 | 0.0738 |
| Fluocinolone               | 0.0062 | 0.0055 | 0.0070 |
| Fluocinonide               | 0.0105 | 0.0094 | 0.0114 |
| Fluorescein                | 0.0117 | 0.0107 | 0.0129 |
| Fluoride                   | 0.0090 | 0.0081 | 0.0098 |
| Fluorouracil               | 0.0119 | 0.0109 | 0.0130 |
| Fluoxetine                 | 0.4362 | 0.4308 | 0.4416 |
| Fluticasone                | 1.1534 | 1.1438 | 1.1633 |
| Fluticasone salmeterol     | 0.3252 | 0.3193 | 0.3304 |
| Fluvoxamine                | 0.0176 | 0.0163 | 0.0189 |
| Formaldehyde               | 0.0018 | 0.0013 | 0.0023 |

|                                    |        |        |        |
|------------------------------------|--------|--------|--------|
| Formoterol fumarate                | 0.0141 | 0.0130 | 0.0153 |
| Foscarnet                          | 0.0022 | 0.0017 | 0.0027 |
| Fosphenytoin                       | 0.3859 | 0.3803 | 0.3912 |
| Furosemide                         | 2.2063 | 2.1954 | 2.2167 |
| Gabapentin                         | 0.1647 | 0.1607 | 0.1691 |
| Gadodiamide                        | 0.0139 | 0.0128 | 0.0151 |
| Gadodiamide caldiamide             | 0.0113 | 0.0103 | 0.0122 |
| Gadolinium                         | 0.1770 | 0.1727 | 0.1808 |
| Gadopentetate                      | 0.3100 | 0.3045 | 0.3158 |
| Gadoteridol                        | 0.0034 | 0.0028 | 0.0040 |
| Ganciclovir                        | 0.0330 | 0.0315 | 0.0345 |
| Gatifloxacin                       | 0.0238 | 0.0223 | 0.0253 |
| Gemtuzumab ozogamicin              | 0.0049 | 0.0042 | 0.0056 |
| Gentamicin                         | 6.6243 | 6.5943 | 6.6544 |
| Gentian violet                     | 0.0657 | 0.0603 | 0.0713 |
| Glucagon                           | 0.0620 | 0.0593 | 0.0645 |
| Glutamic acid hcl                  | 0.0094 | 0.0085 | 0.0103 |
| Glutamine                          | 0.0249 | 0.0232 | 0.0263 |
| Glyburide                          | 0.0097 | 0.0088 | 0.0107 |
| Glycerin supplement                | 1.4441 | 1.4318 | 1.4563 |
| Glycopyrrolate                     | 2.3598 | 2.3481 | 2.3723 |
| Granisetron                        | 0.3124 | 0.3069 | 0.3184 |
| Griseofulvin                       | 0.0048 | 0.0041 | 0.0056 |
| Guaifenesin                        | 0.2439 | 0.2390 | 0.2489 |
| Guaifenesin                        | 0.0138 | 0.0126 | 0.0150 |
| Guaifenesin codeine                | 0.0409 | 0.0391 | 0.0428 |
| Guaifenesin dextromethorphan       | 0.1579 | 0.1540 | 0.1620 |
| Guaifenesin pseudoephedrine        | 0.0156 | 0.0144 | 0.0168 |
| Guanfacine                         | 0.0517 | 0.0495 | 0.0541 |
| Haloperidol                        | 0.1698 | 0.1657 | 0.1739 |
| Halothane                          | 0.0019 | 0.0014 | 0.0024 |
| Heparin                            | 4.9935 | 4.9736 | 5.0118 |
| Hespan                             | 0.0574 | 0.0551 | 0.0596 |
| Homatropine                        | 0.0069 | 0.0061 | 0.0076 |
| Human antithrombin iii             | 0.0034 | 0.0027 | 0.0040 |
| Hyaluronate                        | 0.0093 | 0.0084 | 0.0102 |
| Hyaluronidase                      | 0.0689 | 0.0663 | 0.0715 |
| Hydralazine                        | 0.1366 | 0.1331 | 0.1399 |
| Hydrochlorothiazide                | 0.0445 | 0.0424 | 0.0465 |
| Hydrocodone acetaminophen          | 1.9021 | 1.8901 | 1.9140 |
| Hydrocodone chlorpheniramine       | 0.0185 | 0.0171 | 0.0197 |
| Hydrocodone guaifenesin            | 0.0117 | 0.0107 | 0.0128 |
| Hydrocortisone                     | 0.8661 | 0.8571 | 0.8749 |
| Hydrocortisone polyethylene glycol | 0.0306 | 0.0290 | 0.0322 |
| Hydrocortisone sodium phosphate    | 0.0126 | 0.0115 | 0.0137 |
| Hydrocortisone sodium succinate    | 0.2438 | 0.2393 | 0.2486 |
| Hydromorphone                      | 0.9887 | 0.9798 | 0.9971 |
| Hydroxychloroquine                 | 0.0349 | 0.0332 | 0.0366 |
| Hydroxyurea                        | 0.0701 | 0.0676 | 0.0725 |
| Hydroxyzine                        | 0.5898 | 0.5830 | 0.5974 |
| Hyoscyamine                        | 0.0798 | 0.0772 | 0.0824 |
| Ibuprofen                          | 7.0231 | 7.0014 | 7.0477 |
| Idarubicin                         | 0.0020 | 0.0016 | 0.0024 |
| Ifosfamide                         | 0.0889 | 0.0861 | 0.0915 |
| Imatinib mesylate                  | 0.0036 | 0.0030 | 0.0042 |

|                                       |        |        |        |
|---------------------------------------|--------|--------|--------|
| Imipenem                              | 0.0976 | 0.0946 | 0.1008 |
| Imipenem cilastatin                   | 0.0092 | 0.0083 | 0.0102 |
| Imipramine                            | 0.0277 | 0.0259 | 0.0295 |
| Immune globulin cmv                   | 0.0061 | 0.0053 | 0.0069 |
| Immune globulin hepatitis b           | 0.9741 | 0.9524 | 0.9979 |
| Immune globulin human ig              | 0.3512 | 0.3458 | 0.3568 |
| Immune globulin rho d                 | 0.1540 | 0.1506 | 0.1579 |
| Immune globulin varicella zoster      | 0.0078 | 0.0069 | 0.0086 |
| Indigotindisulfonate                  | 0.0135 | 0.0124 | 0.0146 |
| Indomethacin                          | 0.3394 | 0.3347 | 0.3443 |
| Infliximab                            | 0.0224 | 0.0209 | 0.0238 |
| Insulin                               | 0.9112 | 0.9047 | 0.9177 |
| Interferon gamma 1b                   | 0.0013 | 0.0010 | 0.0017 |
| Iodine                                | 0.0118 | 0.0106 | 0.0130 |
| Iodine 131                            | 0.0020 | 0.0015 | 0.0024 |
| Iodixanol                             | 0.1221 | 0.1189 | 0.1253 |
| Iohexol                               | 0.1725 | 0.1685 | 0.1765 |
| Iopamidol                             | 0.0711 | 0.0686 | 0.0737 |
| Iothalamate                           | 0.0689 | 0.0664 | 0.0713 |
| Iothalamate meglumine                 | 0.0191 | 0.0176 | 0.0205 |
| Ioversol                              | 0.8322 | 0.8238 | 0.8417 |
| Ioxaglate meglumine, ioxaglate sodium | 0.0043 | 0.0036 | 0.0050 |
| Ipratropium                           | 2.5705 | 2.5572 | 2.5831 |
| Ipratropium albuterol                 | 0.3170 | 0.3115 | 0.3222 |
| Irinotecan                            | 0.0327 | 0.0312 | 0.0345 |
| Iron                                  | 0.0799 | 0.0772 | 0.0826 |
| Iron fumarate docusate sodium         | 0.0599 | 0.0574 | 0.0623 |
| Iron gluconate                        | 0.0322 | 0.0306 | 0.0339 |
| Iron sucrose                          | 0.2792 | 0.2678 | 0.2912 |
| Iron sulfate                          | 1.3472 | 1.3378 | 1.3572 |
| Isoflurane                            | 0.0739 | 0.0714 | 0.0767 |
| Isoniazid                             | 0.0190 | 0.0175 | 0.0205 |
| Isoproterenol                         | 0.0303 | 0.0287 | 0.0319 |
| Isradipine                            | 0.0212 | 0.0198 | 0.0227 |
| Itraconazole                          | 0.0158 | 0.0145 | 0.0170 |
| Kanamycin                             | 0.1172 | 0.1139 | 0.1206 |
| Ketamine                              | 0.6112 | 0.6041 | 0.6188 |
| Ketoconazole                          | 0.0266 | 0.0250 | 0.0282 |
| Ketorolac                             | 2.7080 | 2.6939 | 2.7214 |
| L hyoscyamine sulfate                 | 0.0106 | 0.0095 | 0.0116 |
| L-cysteine                            | 0.5114 | 0.5045 | 0.5179 |
| Labetalol                             | 0.2220 | 0.2173 | 0.2266 |
| Lactobacillus                         | 0.3785 | 0.3724 | 0.3845 |
| Lactulose                             | 0.1634 | 0.1596 | 0.1673 |
| Lamivudine                            | 0.0092 | 0.0082 | 0.0102 |
| Lamotrigine                           | 0.2658 | 0.2612 | 0.2710 |
| Lanolin                               | 0.3715 | 0.3626 | 0.3805 |
| Lansoprazole                          | 1.3459 | 1.3352 | 1.3567 |
| Latanoprost                           | 0.0055 | 0.0047 | 0.0062 |
| Leucovorin                            | 0.1572 | 0.1537 | 0.1609 |
| Leuprolide                            | 0.0031 | 0.0025 | 0.0036 |
| Leuprolide depot                      | 0.0130 | 0.0118 | 0.0141 |
| Levalbuterol                          | 2.3251 | 2.3116 | 2.3392 |
| Levetiracetam                         | 0.3640 | 0.3585 | 0.3694 |
| Levocarnitine                         | 0.3299 | 0.3246 | 0.3351 |

|                                  |         |         |         |
|----------------------------------|---------|---------|---------|
| Levofloxacin                     | 0.2998  | 0.2949  | 0.3049  |
| Levothyroxine                    | 0.2898  | 0.2847  | 0.2952  |
| Lidocaine                        | 10.9071 | 10.8456 | 10.9614 |
| Lidocaine cardiac                | 1.0816  | 1.0672  | 1.0951  |
| Lidocaine epinephrine tetracaine | 0.0172  | 0.0160  | 0.0185  |
| Lidocaine epinephrine            | 0.9888  | 0.9800  | 0.9975  |
| Lidocaine prilocaine             | 3.4114  | 3.3841  | 3.4403  |
| Lindane                          | 0.0073  | 0.0066  | 0.0082  |
| Linezolid                        | 0.1021  | 0.0992  | 0.1052  |
| Liothyronine                     | 0.0097  | 0.0086  | 0.0106  |
| Lisinopril                       | 0.0698  | 0.0671  | 0.0723  |
| Lithium                          | 0.1299  | 0.1268  | 0.1334  |
| Lomustine                        | 0.0110  | 0.0100  | 0.0120  |
| Loperamide                       | 0.1130  | 0.1097  | 0.1162  |
| Lopinavir ritonavir              | 0.0074  | 0.0067  | 0.0081  |
| Loratadine                       | 0.3524  | 0.3469  | 0.3578  |
| Loratadine pseudoephedrine       | 0.0131  | 0.0121  | 0.0142  |
| Lorazepam                        | 2.1326  | 2.1197  | 2.1442  |
| Losartan                         | 0.0066  | 0.0057  | 0.0075  |
| Lymphocyte immune globulin       | 0.0046  | 0.0039  | 0.0053  |
| Mafenide                         | 0.0088  | 0.0081  | 0.0097  |
| Magnesia                         | 0.0792  | 0.0763  | 0.0821  |
| Magnesium                        | 1.8079  | 1.7966  | 1.8191  |
| Magnesium carbonate              | 0.0712  | 0.0686  | 0.0739  |
| Magnesium hydroxide              | 0.5059  | 0.4995  | 0.5122  |
| Mannitol                         | 0.4196  | 0.4144  | 0.4247  |
| Meclizine                        | 0.0080  | 0.0072  | 0.0089  |
| Medroxyprogesterone              | 0.1869  | 0.1828  | 0.1908  |
| Megestrol                        | 0.0434  | 0.0413  | 0.0455  |
| Melatonin                        | 0.0109  | 0.0099  | 0.0119  |
| Melphalan                        | 0.0064  | 0.0057  | 0.0070  |
| Meperidine                       | 1.5186  | 1.5078  | 1.5304  |
| Meperidine promethazine          | 0.0179  | 0.0167  | 0.0193  |
| Mepivacaine                      | 0.0814  | 0.0784  | 0.0847  |
| Mercaptopurine                   | 0.1134  | 0.1098  | 0.1166  |
| Meropenem                        | 0.2533  | 0.2486  | 0.2580  |
| Mesalamine                       | 0.0783  | 0.0762  | 0.0806  |
| Mesna                            | 0.2663  | 0.2622  | 0.2702  |
| Metaproterenol                   | 0.0256  | 0.0238  | 0.0276  |
| Metformin                        | 0.0642  | 0.0617  | 0.0668  |
| Methadone                        | 0.2370  | 0.2325  | 0.2414  |
| Methimazole                      | 0.0039  | 0.0033  | 0.0045  |
| Methocarbamol                    | 0.0258  | 0.0243  | 0.0274  |
| Methohexital                     | 0.0058  | 0.0050  | 0.0065  |
| Methotrexate                     | 0.2510  | 0.2460  | 0.2553  |
| Methyldopa                       | 0.0118  | 0.0107  | 0.0130  |
| Methylene blue                   | 0.1219  | 0.1189  | 0.1248  |
| Methylergon                      | 0.1727  | 0.1681  | 0.1769  |
| Methylphenidate                  | 0.2887  | 0.2841  | 0.2940  |
| Methylprednisolone               | 3.8684  | 3.8541  | 3.8824  |
| Methoxyflurane                   | 0.0137  | 0.0125  | 0.0150  |
| Metoclopramide                   | 2.7527  | 2.7382  | 2.7673  |
| Metolazone                       | 0.0628  | 0.0605  | 0.0652  |
| Metoprolol                       | 0.0678  | 0.0653  | 0.0703  |
| Metrizamide                      | 0.0191  | 0.0176  | 0.0206  |

|                                   |        |        |        |
|-----------------------------------|--------|--------|--------|
| Metronidazole                     | 0.9892 | 0.9804 | 0.9980 |
| Mexiletine                        | 0.0019 | 0.0014 | 0.0023 |
| Micafungin                        | 0.0069 | 0.0060 | 0.0077 |
| Miconazole                        | 0.0974 | 0.0939 | 0.1003 |
| Midazolam                         | 5.9647 | 5.9450 | 5.9831 |
| Milrinone                         | 0.3376 | 0.3339 | 0.3415 |
| Minocycline                       | 0.0215 | 0.0202 | 0.0230 |
| Minoxidil                         | 0.0092 | 0.0083 | 0.0102 |
| Mirtazapine                       | 0.0701 | 0.0676 | 0.0727 |
| Misoprostol                       | 0.1910 | 0.1867 | 0.1954 |
| Mitomycin                         | 0.0089 | 0.0081 | 0.0098 |
| Mitoxantrone                      | 0.0143 | 0.0132 | 0.0156 |
| Mivacurium                        | 0.3849 | 0.3788 | 0.3911 |
| Modafinil                         | 0.0275 | 0.0260 | 0.0292 |
| Mometasone                        | 0.2302 | 0.2253 | 0.2349 |
| Montelukast                       | 1.3879 | 1.3774 | 1.3988 |
| Morphine                          | 7.8720 | 7.8523 | 7.8894 |
| Moxifloxacin                      | 0.0864 | 0.0833 | 0.0898 |
| Mupirocin                         | 0.7781 | 0.7679 | 0.7886 |
| Mycophenolate                     | 0.0999 | 0.0970 | 0.1025 |
| Nadolol                           | 0.0053 | 0.0047 | 0.0061 |
| Nafcillin                         | 0.2814 | 0.2761 | 0.2863 |
| Nalbuphine                        | 0.5919 | 0.5843 | 0.6004 |
| Nalmefene                         | 0.0079 | 0.0069 | 0.0089 |
| Naloxone                          | 0.6364 | 0.6235 | 0.6481 |
| Naproxen                          | 0.1802 | 0.1761 | 0.1845 |
| Neomycin                          | 0.0541 | 0.0512 | 0.0573 |
| Neomycin polymixin bacitracin     | 0.7785 | 0.7628 | 0.7949 |
| Neomycin polymyxin                | 0.1584 | 0.1541 | 0.1629 |
| Neomycin polymyxin hydrocortisone | 0.0406 | 0.0386 | 0.0426 |
| Neostigmine                       | 1.8181 | 1.8076 | 1.8292 |
| Nesiritide                        | 0.0052 | 0.0045 | 0.0058 |
| Nevirapine                        | 0.0040 | 0.0030 | 0.0052 |
| Nicardipine                       | 0.0591 | 0.0569 | 0.0615 |
| Nicotine                          | 0.1037 | 0.1006 | 0.1070 |
| Nifedipine                        | 0.1743 | 0.1702 | 0.1781 |
| Nitazoxanide                      | 0.0163 | 0.0152 | 0.0175 |
| Nitrofurantoin                    | 0.0766 | 0.0738 | 0.0791 |
| Nitrofurantoin                    | 0.0276 | 0.0259 | 0.0292 |
| Nitroglycerin                     | 0.1198 | 0.1166 | 0.1234 |
| Nitroprusside                     | 0.1820 | 0.1785 | 0.1852 |
| Nitrous oxide                     | 0.0268 | 0.0251 | 0.0285 |
| Norepinephrine                    | 0.0778 | 0.0753 | 0.0803 |
| Norethindrone                     | 0.0011 | 0.0008 | 0.0014 |
| Nortriptyline                     | 0.0124 | 0.0115 | 0.0136 |
| Nystatin                          | 1.7684 | 1.7551 | 1.7821 |
| Nystatin triamcinolone            | 0.0645 | 0.0621 | 0.0671 |
| Octreotide                        | 0.0312 | 0.0295 | 0.0329 |
| Ofloxacin                         | 0.1301 | 0.1268 | 0.1336 |
| Olanzapine                        | 0.1792 | 0.1753 | 0.1832 |
| Olopatadine                       | 0.0064 | 0.0056 | 0.0071 |
| Omeprazole                        | 0.2379 | 0.2332 | 0.2431 |
| Ondansetron                       | 5.9153 | 5.8978 | 5.9336 |
| Opium                             | 0.0176 | 0.0163 | 0.0191 |
| Orphenadrine                      | 0.0110 | 0.0100 | 0.0119 |

|                                                       |        |        |        |
|-------------------------------------------------------|--------|--------|--------|
| Osetamivir                                            | 0.1006 | 0.0978 | 0.1035 |
| Oxacillin                                             | 0.2028 | 0.1986 | 0.2071 |
| Oxcarbazepine                                         | 0.4198 | 0.4138 | 0.4263 |
| Oxybutynin                                            | 0.1872 | 0.1837 | 0.1908 |
| Oxycodone                                             | 0.6656 | 0.6546 | 0.6768 |
| Oxycodone asprin                                      | 1.4261 | 1.4139 | 1.4381 |
| Oxymetazoline                                         | 0.3675 | 0.3619 | 0.3730 |
| Oxymorphone                                           | 0.0190 | 0.0176 | 0.0204 |
| Oxytocin                                              | 2.1101 | 2.1015 | 2.1189 |
| Palivizumab                                           | 0.9043 | 0.8965 | 0.9126 |
| Palonosetron hcl                                      | 0.0028 | 0.0022 | 0.0033 |
| Pamidronate                                           | 0.0106 | 0.0096 | 0.0116 |
| Pancrelipase                                          | 0.0719 | 0.0697 | 0.0742 |
| Pancuronium                                           | 0.3023 | 0.2972 | 0.3075 |
| Pantoprazole                                          | 0.6516 | 0.6444 | 0.6596 |
| Papaverine                                            | 0.1990 | 0.1949 | 0.2030 |
| Paroxetine                                            | 0.0713 | 0.0685 | 0.0741 |
| Pegaspargase                                          | 0.0572 | 0.0553 | 0.0593 |
| Pegfilgrastim                                         | 0.0267 | 0.0251 | 0.0282 |
| Penicillin G                                          | 0.5604 | 0.5520 | 0.5685 |
| Penicillin v                                          | 0.1479 | 0.1442 | 0.1517 |
| Pentamidine                                           | 0.0733 | 0.0707 | 0.0758 |
| Pentobarbital                                         | 0.2541 | 0.2492 | 0.2591 |
| Peptamen                                              | 0.0415 | 0.0397 | 0.0433 |
| Permethrin                                            | 0.0406 | 0.0386 | 0.0426 |
| Perphenazine                                          | 0.0055 | 0.0048 | 0.0063 |
| Phenazopyridine                                       | 0.0623 | 0.0598 | 0.0648 |
| Phenobarbital                                         | 0.8253 | 0.8168 | 0.8332 |
| Phenol                                                | 0.1257 | 0.1221 | 0.1287 |
| Phentolamine                                          | 0.0193 | 0.0179 | 0.0208 |
| Phenylephrine                                         | 0.9449 | 0.9358 | 0.9540 |
| Phenylephrine chlorpheniramine hydrocodone            | 0.0192 | 0.0178 | 0.0206 |
| Phenylpropanolamine brompheniramine                   | 0.0204 | 0.0192 | 0.0218 |
| Phenylpropanolamine chlorpheniramine dextromethorphan | 0.0315 | 0.0299 | 0.0333 |
| Phenytoin                                             | 0.2990 | 0.2940 | 0.3043 |
| Physiosol                                             | 0.0730 | 0.0705 | 0.0753 |
| Physostigmine                                         | 0.2827 | 0.2705 | 0.2949 |
| Pimecrolimus                                          | 0.0217 | 0.0202 | 0.0231 |
| Piperacillin                                          | 0.0221 | 0.0207 | 0.0236 |
| Piperacillin tazobactam                               | 0.7983 | 0.7900 | 0.8060 |
| Polycarbophil                                         | 0.0080 | 0.0071 | 0.0089 |
| Polyethylene glycol electrolyte                       | 1.1256 | 1.1160 | 1.1358 |
| Polymyxin                                             | 0.0746 | 0.0720 | 0.0772 |
| Polymyxin bacitracin                                  | 0.5896 | 0.5740 | 0.6057 |
| Polymyxin trimethoprim                                | 0.0771 | 0.0736 | 0.0807 |
| Poractant                                             | 0.3449 | 0.3390 | 0.3508 |
| Potassium acetate                                     | 0.7057 | 0.6972 | 0.7139 |
| Potassium chloride                                    | 6.0098 | 5.9871 | 6.0320 |
| Potassium iodide                                      | 0.0066 | 0.0058 | 0.0074 |
| Potassium phosphate                                   | 0.9427 | 0.9344 | 0.9508 |
| Potassium phosphate sodium phosphate                  | 0.0030 | 0.0024 | 0.0036 |
| Povidone iodine                                       | 0.1776 | 0.1735 | 0.1818 |
| Pramipexole                                           | 0.0126 | 0.0115 | 0.0136 |
| Pramoxine                                             | 0.2356 | 0.2309 | 0.2403 |

|                                                  |        |        |        |
|--------------------------------------------------|--------|--------|--------|
| Pravastatin                                      | 0.0029 | 0.0024 | 0.0035 |
| Prazosin                                         | 0.0155 | 0.0143 | 0.0168 |
| Prednisolone                                     | 2.6815 | 2.6673 | 2.6951 |
| Prednisone                                       | 0.9471 | 0.9391 | 0.9554 |
| Pregabalin                                       | 0.0128 | 0.0117 | 0.0138 |
| Primidone                                        | 0.0062 | 0.0055 | 0.0070 |
| Probenecid                                       | 0.0032 | 0.0026 | 0.0038 |
| Procainamide                                     | 0.0057 | 0.0050 | 0.0066 |
| Procarbazine                                     | 0.0019 | 0.0015 | 0.0023 |
| Prochlorperazine                                 | 0.1510 | 0.1472 | 0.1548 |
| Promazine                                        | 0.0018 | 0.0014 | 0.0022 |
| Promethazine                                     | 2.8213 | 2.8067 | 2.8358 |
| Promethazine codeine                             | 0.0235 | 0.0219 | 0.0250 |
| Proparacaine                                     | 0.1250 | 0.1219 | 0.1284 |
| Propofol                                         | 5.2665 | 5.2502 | 5.2826 |
| Propoxyphene                                     | 0.0121 | 0.0110 | 0.0132 |
| Propoxyphene acetaminophen                       | 0.3345 | 0.3292 | 0.3403 |
| Propranolol                                      | 0.1330 | 0.1294 | 0.1365 |
| Protamine                                        | 0.1108 | 0.1085 | 0.1131 |
| Protamine sulfate                                | 0.1222 | 0.1197 | 0.1246 |
| Protriptyline                                    | 0.2748 | 0.2630 | 0.2870 |
| Pseudoephedrine                                  | 0.1316 | 0.1283 | 0.1353 |
| Pseudoephedrine brompheniramine                  | 0.0597 | 0.0574 | 0.0623 |
| Pseudoephedrine brompheniramine dextromethorphan | 0.0152 | 0.0140 | 0.0165 |
| Pseudoephedrine carbinoxamine                    | 0.0179 | 0.0167 | 0.0192 |
| Pseudoephedrine carbinoxamine dextromethorphan   | 0.0669 | 0.0645 | 0.0695 |
| Psyllium                                         | 0.0441 | 0.0420 | 0.0462 |
| Pyrazinamide                                     | 0.0082 | 0.0073 | 0.0091 |
| Pyridostigmine                                   | 0.0146 | 0.0135 | 0.0158 |
| Quetiapine                                       | 0.0339 | 0.0321 | 0.0357 |
| Quetiapine fumarate                              | 0.4544 | 0.4485 | 0.4603 |
| Ranitidine                                       | 3.8649 | 3.8462 | 3.8827 |
| Rasburicase                                      | 0.0129 | 0.0119 | 0.0140 |
| Remifentanyl                                     | 0.1321 | 0.1288 | 0.1355 |
| Retepase                                         | 0.0130 | 0.0120 | 0.0140 |
| Ribavirin                                        | 0.0024 | 0.0020 | 0.0029 |
| Rifampin                                         | 0.1295 | 0.1261 | 0.1328 |
| Risperidone                                      | 0.4903 | 0.4844 | 0.4970 |
| Ritonavir                                        | 0.0038 | 0.0033 | 0.0043 |
| Rituximab                                        | 0.0188 | 0.0175 | 0.0201 |
| Rocuronium                                       | 2.5251 | 2.5126 | 2.5374 |
| Ropivacaine                                      | 0.4723 | 0.4661 | 0.4791 |
| Rosiglitazone                                    | 0.0038 | 0.0032 | 0.0045 |
| Salmeterol                                       | 0.0081 | 0.0073 | 0.0091 |
| Salmeterol xinafoate fluticasone                 | 0.0922 | 0.0892 | 0.0953 |
| Sargramostim                                     | 0.0060 | 0.0052 | 0.0068 |
| Scopolamine                                      | 0.0770 | 0.0741 | 0.0795 |
| Selenium                                         | 0.1645 | 0.1600 | 0.1690 |
| Senna                                            | 0.3761 | 0.3704 | 0.3824 |
| Senna docusate                                   | 0.3596 | 0.3538 | 0.3657 |
| Sertraline                                       | 0.3556 | 0.3497 | 0.3614 |
| Sevelamer                                        | 0.0158 | 0.0147 | 0.0170 |

|                                     |        |        |        |
|-------------------------------------|--------|--------|--------|
| Sevoflurane                         | 0.2334 | 0.2284 | 0.2383 |
| Sildenafil                          | 0.0332 | 0.0312 | 0.0350 |
| Silver nitrate                      | 0.1641 | 0.1570 | 0.1718 |
| Silver sulfadiazine                 | 0.2268 | 0.2227 | 0.2308 |
| Simethicone                         | 1.0598 | 1.0476 | 1.0718 |
| Sincalide                           | 0.0205 | 0.0192 | 0.0219 |
| Sirolimus                           | 0.0225 | 0.0210 | 0.0239 |
| Sodium acetate                      | 0.7036 | 0.6963 | 0.7114 |
| Sodium benzoate                     | 0.0012 | 0.0009 | 0.0015 |
| Sodium bicarbonate                  | 1.9117 | 1.8987 | 1.9247 |
| Sodium citrate                      | 0.4290 | 0.4232 | 0.4349 |
| Sodium ferric gluconate complex     | 0.0195 | 0.0181 | 0.0208 |
| Sodium lactate                      | 0.0582 | 0.0555 | 0.0610 |
| Sodium phenylbutyrate               | 0.0013 | 0.0010 | 0.0017 |
| Sodium phosphate                    | 0.4896 | 0.4830 | 0.4959 |
| Sodium sulfacetamide                | 0.0030 | 0.0025 | 0.0036 |
| Sodium thiosulfate                  | 0.0115 | 0.0104 | 0.0125 |
| Somatropin                          | 0.0102 | 0.0092 | 0.0112 |
| Sotalol                             | 0.0111 | 0.0102 | 0.0121 |
| Spirolactone                        | 0.3215 | 0.3167 | 0.3265 |
| Stavudine                           | 0.0030 | 0.0025 | 0.0035 |
| Succimer                            | 0.0016 | 0.0013 | 0.0020 |
| Succinylcholine chloride            | 1.4648 | 1.4533 | 1.4755 |
| Sucralfate                          | 0.2498 | 0.2450 | 0.2548 |
| Sufentanil                          | 0.1612 | 0.1575 | 0.1651 |
| Sulfacetamide op                    | 0.0472 | 0.0446 | 0.0498 |
| Sulfasalazine                       | 0.0098 | 0.0088 | 0.0108 |
| Sumatriptan                         | 0.0230 | 0.0216 | 0.0244 |
| Tacrolimus                          | 0.1235 | 0.1201 | 0.1267 |
| Tamsulosin                          | 0.0141 | 0.0130 | 0.0151 |
| Technetium-99m unspecified          | 0.1105 | 0.1072 | 0.1139 |
| Tegaserod                           | 0.0182 | 0.0170 | 0.0196 |
| Temazepam                           | 0.0451 | 0.0430 | 0.0470 |
| Temozolomide                        | 0.0079 | 0.0070 | 0.0088 |
| Terbutaline                         | 0.2410 | 0.2363 | 0.2459 |
| Testosterone                        | 0.0012 | 0.0009 | 0.0016 |
| Tetracaine                          | 0.2000 | 0.1960 | 0.2040 |
| Tetracycline                        | 0.0152 | 0.0140 | 0.0164 |
| Theophylline                        | 0.1044 | 0.1013 | 0.1074 |
| Thioguanine                         | 0.0249 | 0.0233 | 0.0264 |
| Thiopental                          | 0.1565 | 0.1526 | 0.1606 |
| Thiotepa                            | 0.0027 | 0.0022 | 0.0032 |
| Thrombin                            | 0.6414 | 0.6353 | 0.6475 |
| Tiagabine                           | 0.0073 | 0.0065 | 0.0081 |
| Ticarcillin                         | 0.0680 | 0.0660 | 0.0710 |
| Ticarcillin clavulanate             | 0.1683 | 0.1642 | 0.1724 |
| Timolol                             | 0.0020 | 0.0016 | 0.0025 |
| Tizanidine                          | 0.0259 | 0.0243 | 0.0275 |
| Tobramycin                          | 0.4897 | 0.4827 | 0.4973 |
| Tobramycin dexamethasone ophthalmic | 0.0463 | 0.0440 | 0.0488 |
| Tolterodine                         | 0.0179 | 0.0166 | 0.0192 |
| Topiramate                          | 0.3117 | 0.3063 | 0.3169 |
| Topotecan hcl                       | 0.0070 | 0.0061 | 0.0078 |
| Tramadol                            | 0.0537 | 0.0515 | 0.0564 |
| Tranexamic acid                     | 0.0061 | 0.0053 | 0.0070 |



|                                                            |        |        |        |
|------------------------------------------------------------|--------|--------|--------|
| Trazodone                                                  | 0.2732 | 0.2684 | 0.2780 |
| Tretinoin                                                  | 0.0023 | 0.0018 | 0.0028 |
| Triamcinolone                                              | 0.2345 | 0.2298 | 0.2392 |
| Trifluridine                                               | 0.0060 | 0.0050 | 0.0069 |
| Trihexyphenidyl                                            | 0.0076 | 0.0067 | 0.0085 |
| Trimethobenzamide                                          | 0.2117 | 0.2071 | 0.2161 |
| Trimethoprim                                               | 0.0023 | 0.0019 | 0.0029 |
| Trimethoprim sulfamethoxazole                              | 1.2482 | 1.2382 | 1.2578 |
| Tromethamine                                               | 0.0799 | 0.0769 | 0.0827 |
| Tropicamide                                                | 0.1975 | 0.1930 | 0.2019 |
| Undecylenic acid                                           | 0.0152 | 0.0135 | 0.0171 |
| Urokinase                                                  | 0.0074 | 0.0066 | 0.0083 |
| Ursodiol                                                   | 0.2372 | 0.2327 | 0.2416 |
| Vacc diphth teta pertussis polio                           | 0.0416 | 0.0367 | 0.0463 |
| Vaccine: diptheria, tetanus                                | 0.1912 | 0.1872 | 0.1951 |
| Vaccine: diptheria, tetanus, pertussis                     | 0.1624 | 0.1585 | 0.1661 |
| Vaccine: diptheria, tetanus, pertussis, haemophilus b      | 0.0092 | 0.0082 | 0.0102 |
| Vaccine: diptheria, tetanus, pertussis, hepatitis b, polio | 0.1706 | 0.1671 | 0.1744 |
| Vaccine: haemophilus b                                     | 0.2667 | 0.2623 | 0.2710 |
| Vaccine: haemophilus b, hepatitis b                        | 0.1685 | 0.1599 | 0.1762 |
| Vaccine: hepatitis a                                       | 0.0105 | 0.0089 | 0.0120 |
| Vaccine: influenza                                         | 0.2736 | 0.2686 | 0.2788 |
| Vaccine: measles, mumps, rubella                           | 0.0521 | 0.0499 | 0.0543 |
| Vaccine: meningococcal                                     | 0.0135 | 0.0124 | 0.0146 |
| Vaccine: pneumococcal                                      | 0.4110 | 0.4056 | 0.4167 |
| Vaccine: polio                                             | 0.1465 | 0.1431 | 0.1499 |
| Vaccine: rabies                                            | 0.0027 | 0.0021 | 0.0033 |
| Vaccine: rubella                                           | 0.1250 | 0.1215 | 0.1286 |
| Vaccine: tetanus                                           | 0.0432 | 0.0412 | 0.0453 |
| Vaccine: varicella                                         | 0.0097 | 0.0087 | 0.0106 |
| Valacyclovir                                               | 0.0236 | 0.0221 | 0.0252 |
| Valganciclovir                                             | 0.0380 | 0.0364 | 0.0396 |
| Valproic acid                                              | 0.2926 | 0.2875 | 0.2978 |
| Valsartan                                                  | 0.0055 | 0.0048 | 0.0062 |
| Vancomycin                                                 | 2.5602 | 2.5477 | 2.5719 |
| Vasopressin                                                | 0.0603 | 0.0581 | 0.0626 |
| Vecuronium                                                 | 1.1062 | 1.0966 | 1.1155 |
| Venlafaxine                                                | 0.0831 | 0.0805 | 0.0858 |
| Verapamil                                                  | 0.0208 | 0.0194 | 0.0221 |
| Vinblastine                                                | 0.0463 | 0.0442 | 0.0484 |
| Vincristine                                                | 0.2871 | 0.2823 | 0.2916 |
| Vitamin a                                                  | 0.1410 | 0.1375 | 0.1445 |
| Vitamin b1                                                 | 0.0451 | 0.0431 | 0.0472 |
| Vitamin B12                                                | 0.0405 | 0.0386 | 0.0427 |
| Vitamin b2                                                 | 0.0049 | 0.0041 | 0.0056 |
| Vitamin b6                                                 | 0.0559 | 0.0538 | 0.0581 |
| Vitamin B9                                                 | 0.3827 | 0.3773 | 0.3881 |
| Vitamin c                                                  | 0.1096 | 0.1063 | 0.1127 |
| Vitamin D                                                  | 0.2026 | 0.1983 | 0.2068 |
| Vitamin e                                                  | 0.1142 | 0.1109 | 0.1174 |
| Voriconazole                                               | 0.0648 | 0.0625 | 0.0673 |
| Warfarin                                                   | 0.0816 | 0.0789 | 0.0841 |

|              |        |        |        |
|--------------|--------|--------|--------|
| Zalepon      | 0.0048 | 0.0042 | 0.0055 |
| Zanamivir    | 0.0037 | 0.0030 | 0.0043 |
| Zidovudine   | 0.0663 | 0.0615 | 0.0710 |
| Zinc         | 0.3416 | 0.3358 | 0.3471 |
| Ziprasidone  | 0.1597 | 0.1560 | 0.1634 |
| Zolmitriptan | 0.1223 | 0.1190 | 0.1257 |
| Zolpidem     | 0.4169 | 0.4107 | 0.4231 |
